# Supplementary material for: A systems biology approach sheds new light on Escherichia coli acid resistance
Source: PubMed Central journal article supplement — Nucleic Acids Res. 2011 Jun 17;39(17):7512–28. doi: 10.1093/nar/gkr338 (PMC3177180; doi:10.1093/nar/gkr338), 2011-06-17
Supplement: supp_gkr338_Supplementary_Material.pdf [file supp_gkr338_Supplementary_Material.pdf]

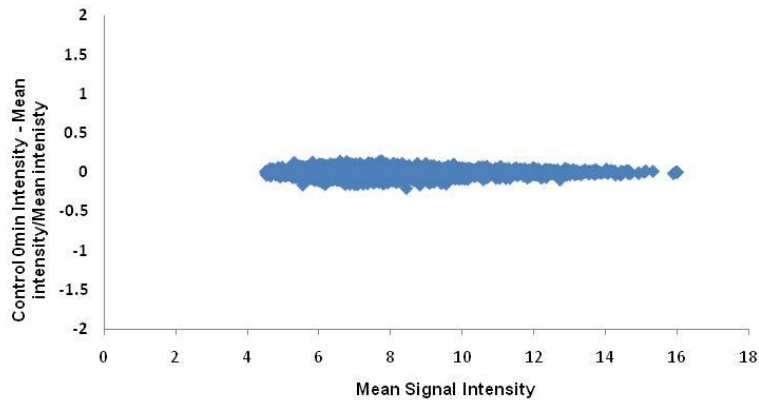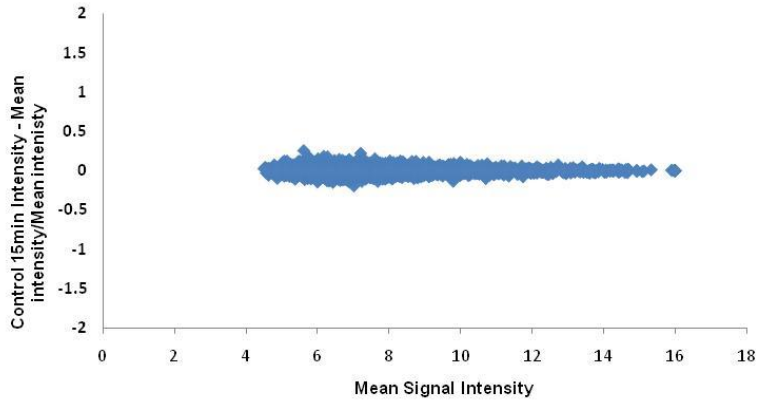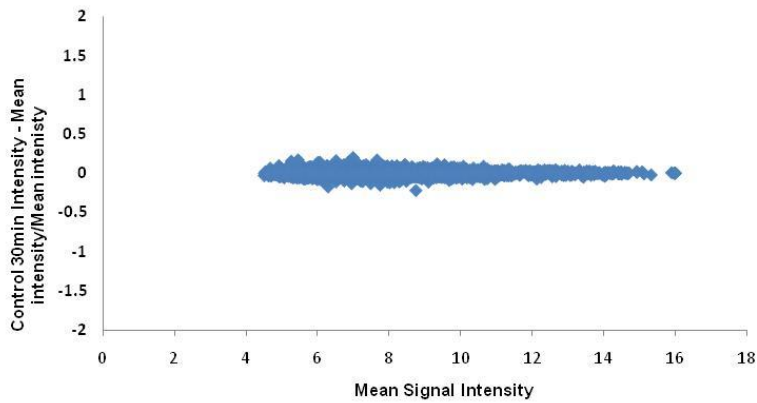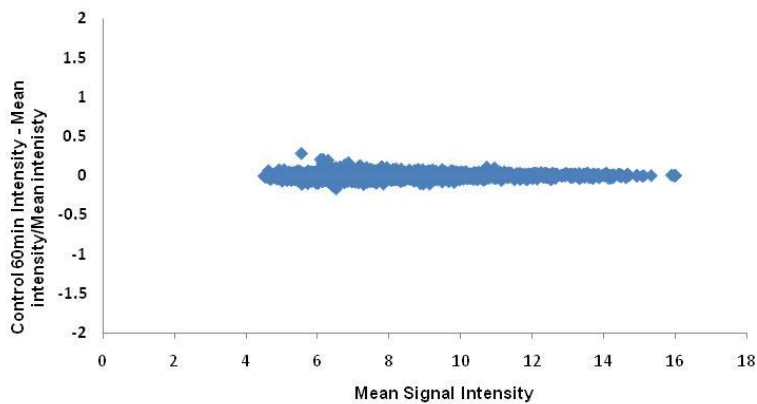

Supplementary figure 1

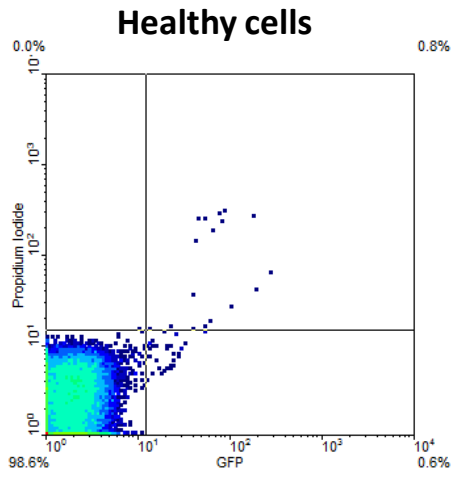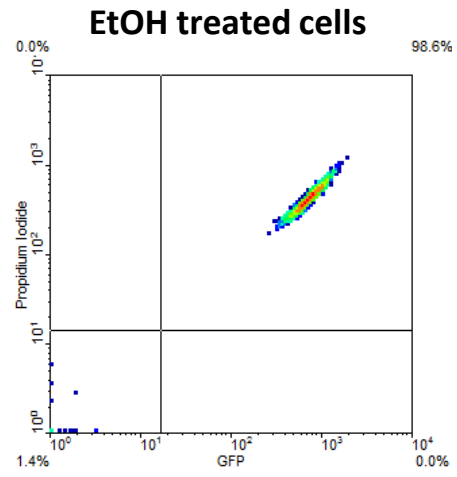

Supplementary  
figure 2

# OXIDATIVE PHOSPHORYLATION

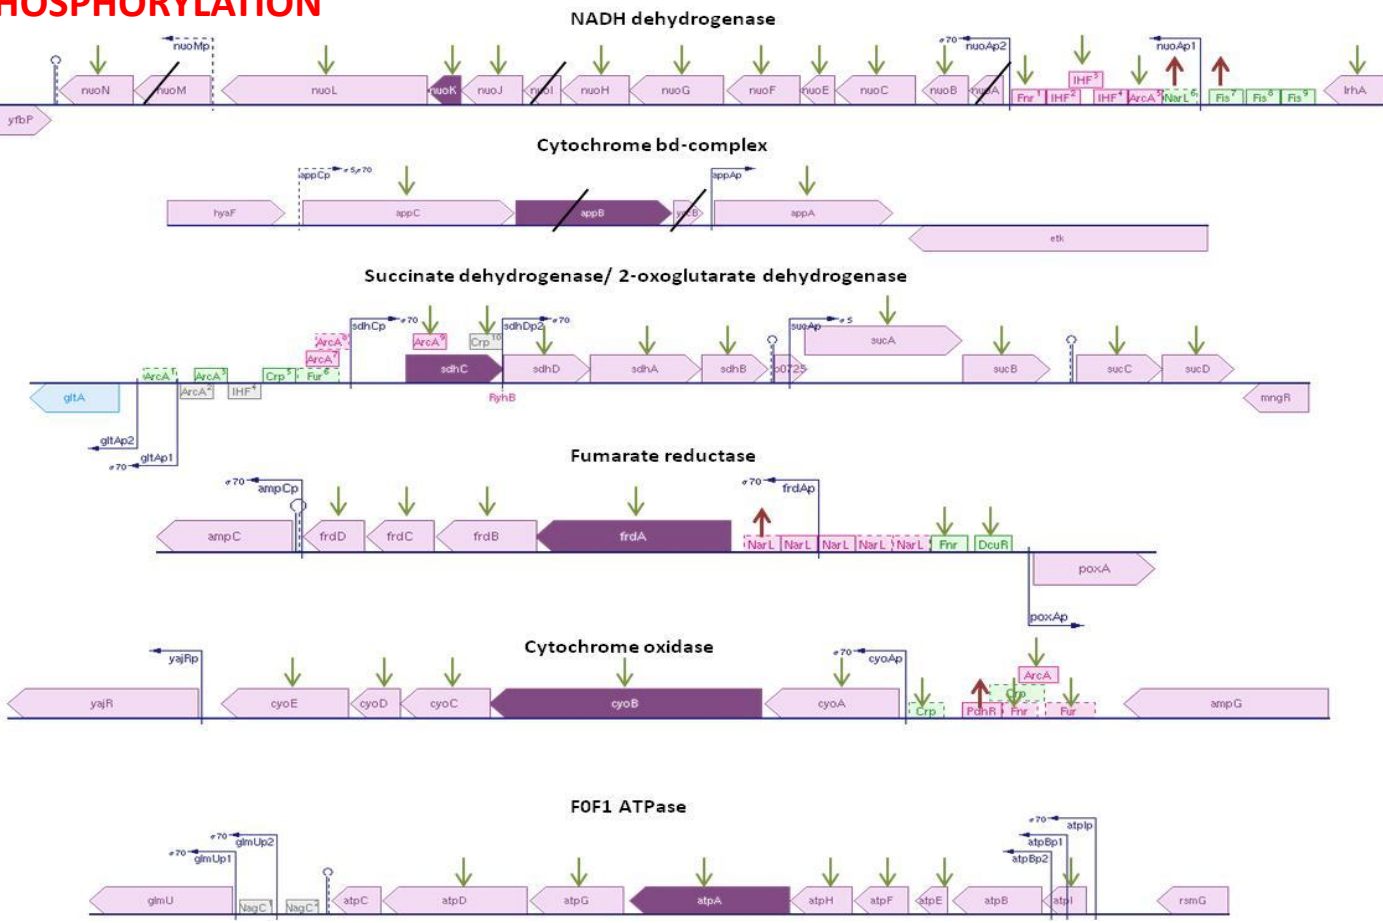

Supplementary figure 3 (A)

# ANAEROBIC RESPIRATION

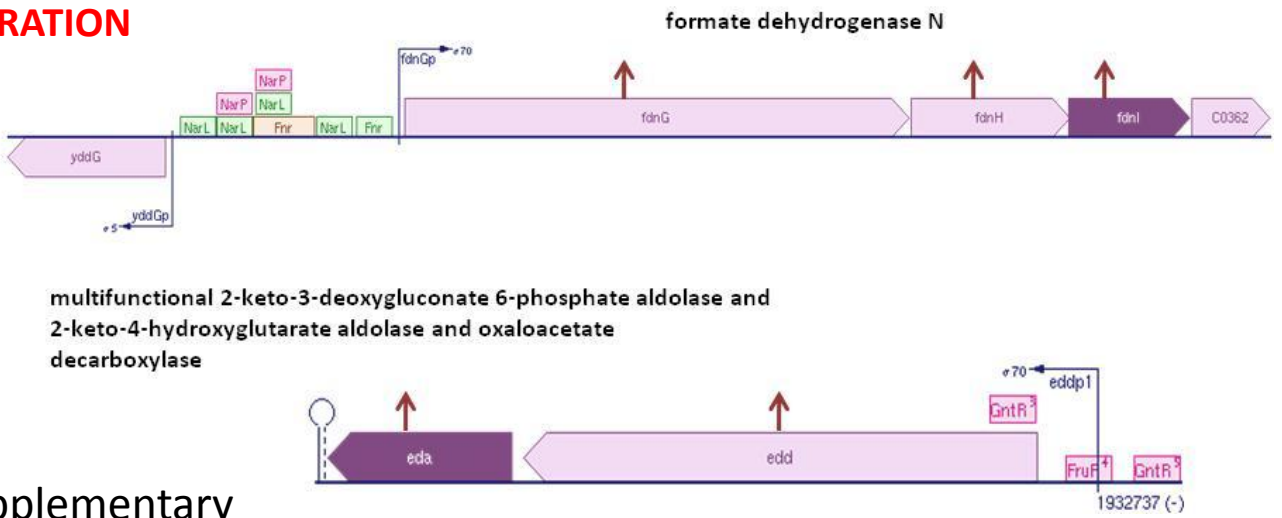

multifunctional 2-keto-3-deoxygluconate 6-phosphate aldolase and 2-keto-4-hydroxyglutarate aldolase and oxaloacetate decarboxylase

Supplementary figure 3 (B)



OXIDATIVE PHOSPHORYLATION

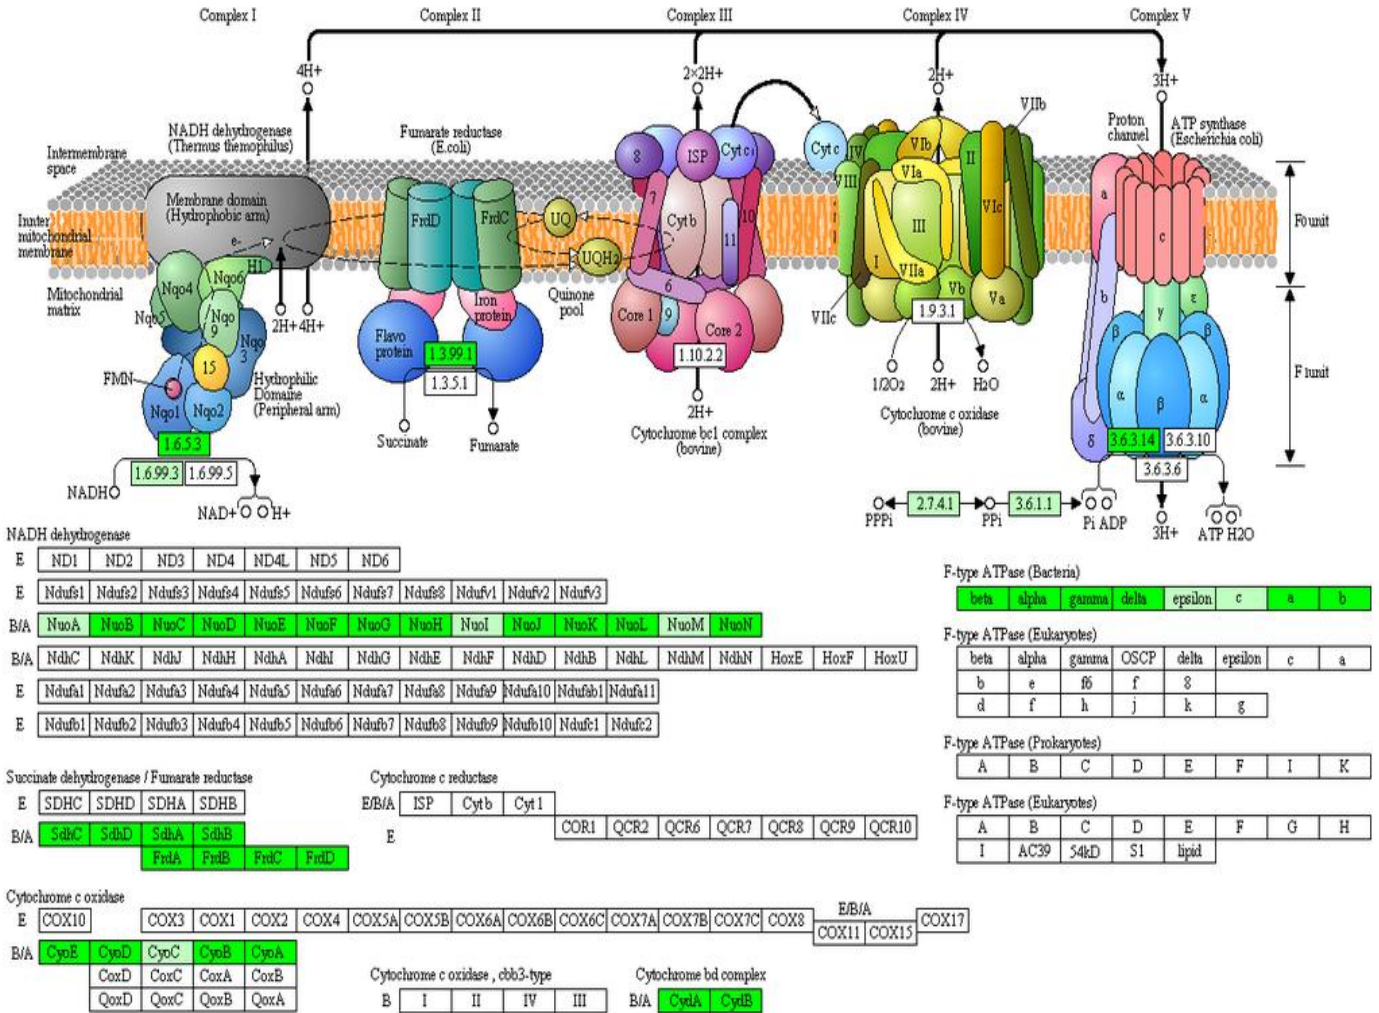

Supplementary figure 4 (1)



# CITRATE CYCLE (TCA CYCLE)

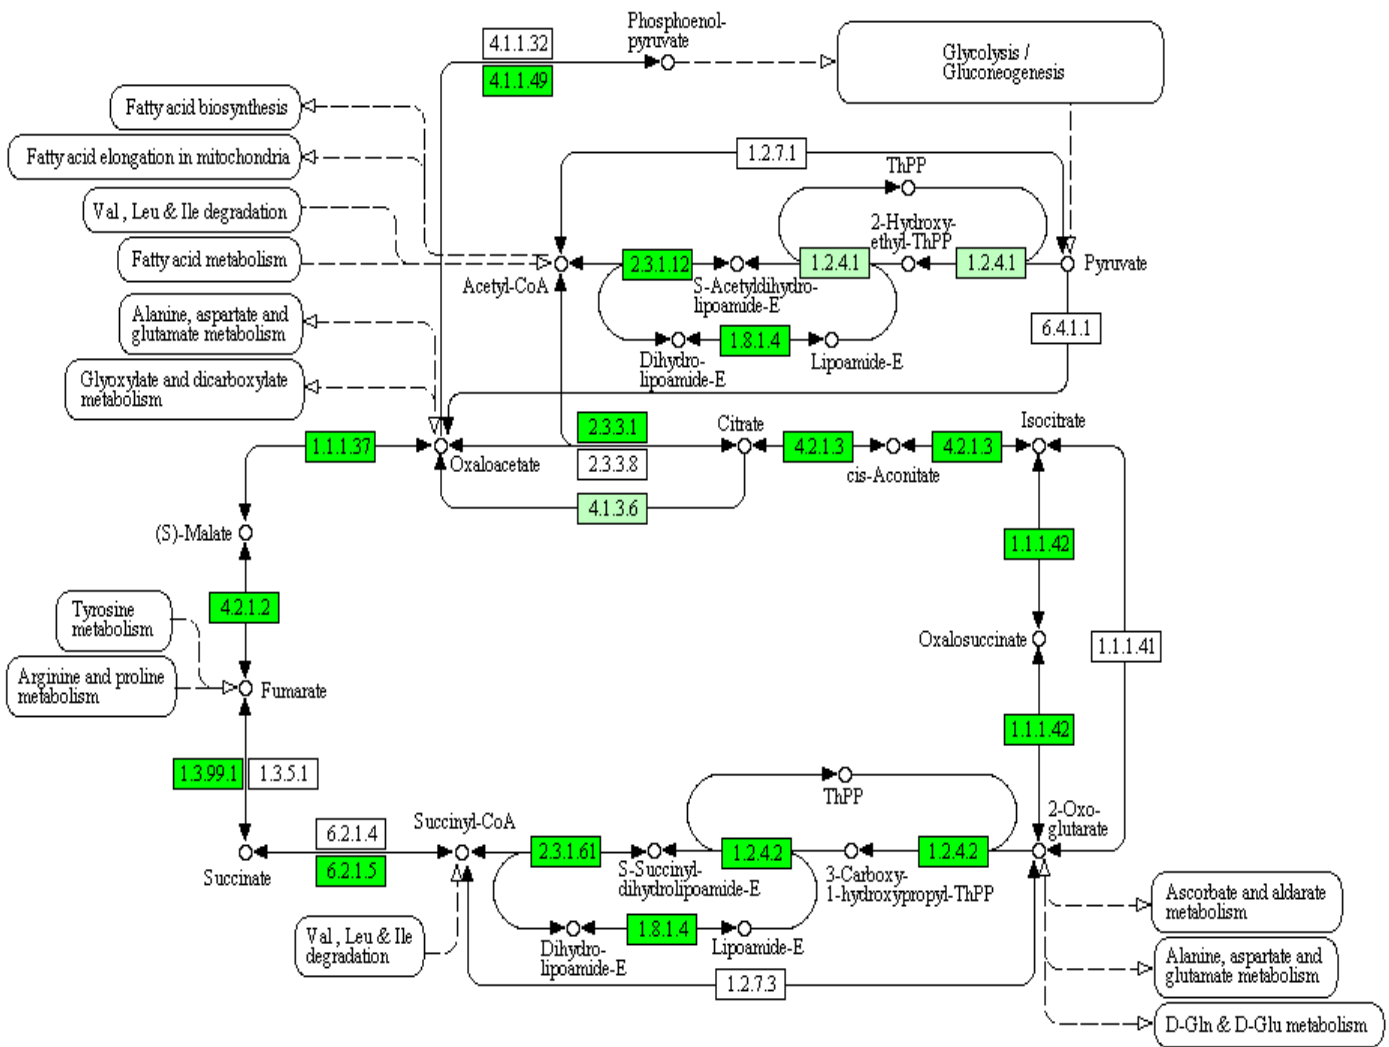

Supplementary figure 4 (3)



**RIBOSOME**

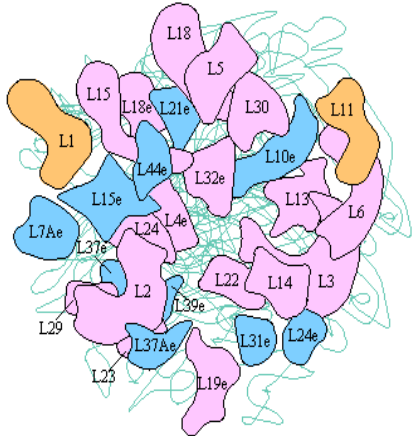

Large subunit (*Haloarcula marismortui*)

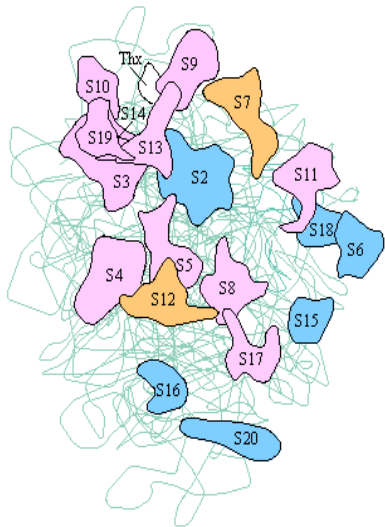

Small subunit (*Thermus aquaticus*)

**Ribosomal RNAs**

|                    |     |    |      |     |
|--------------------|-----|----|------|-----|
| Bacteria / Archaea | 23S | 5S |      | 16S |
| Eukaryotes         | 25S | 5S | 5.8S | 18S |

**Ribosomal proteins**

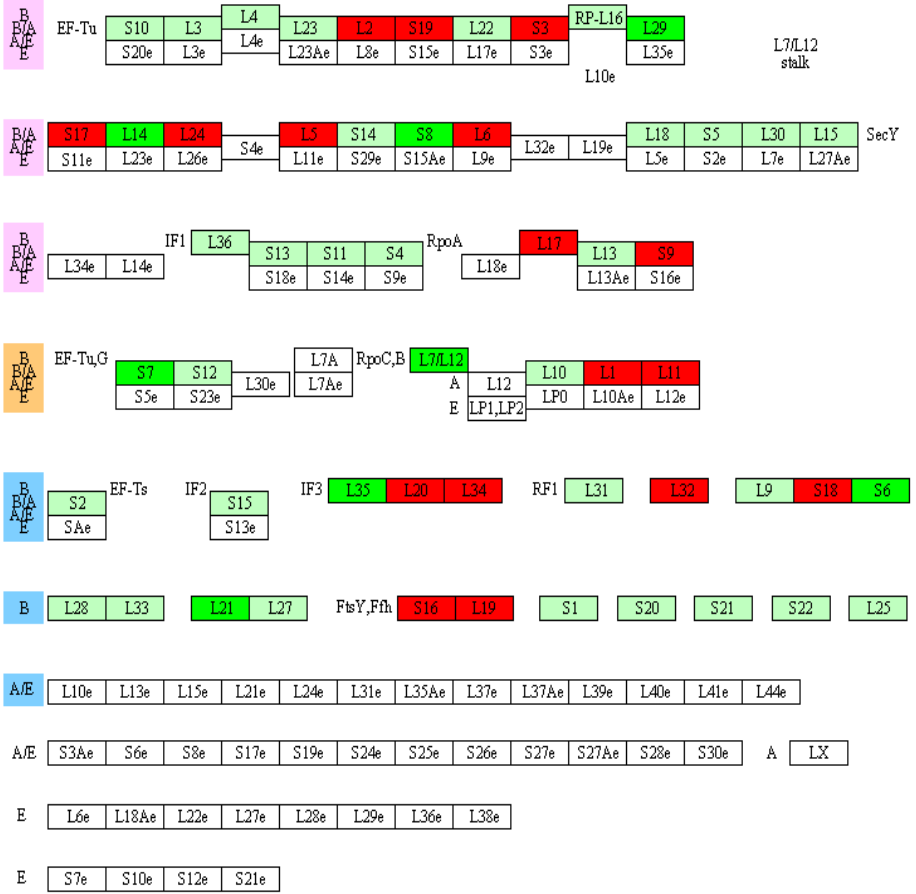

Supplementary figure 4 (4)



PHOSPHOTRANSFERASE SYSTEM (PTS)

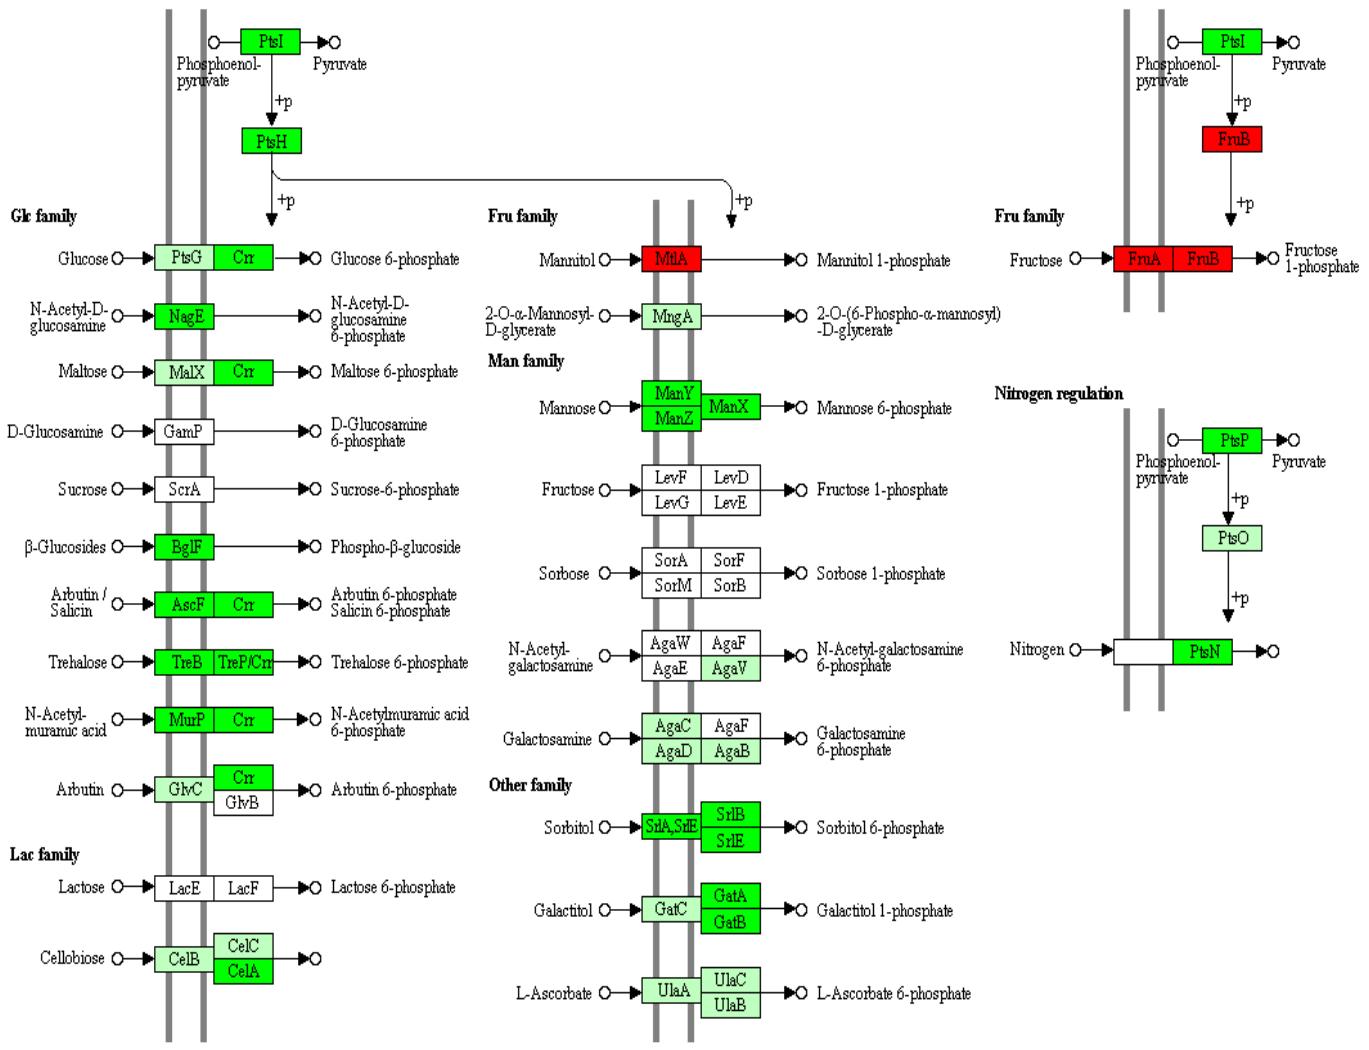

02060 2/25/10  
 (c) Kanehisa Laboratories

Supplementary  
 figure 4 (5)

GLYCOLYSIS / GLUCONEOGENESIS

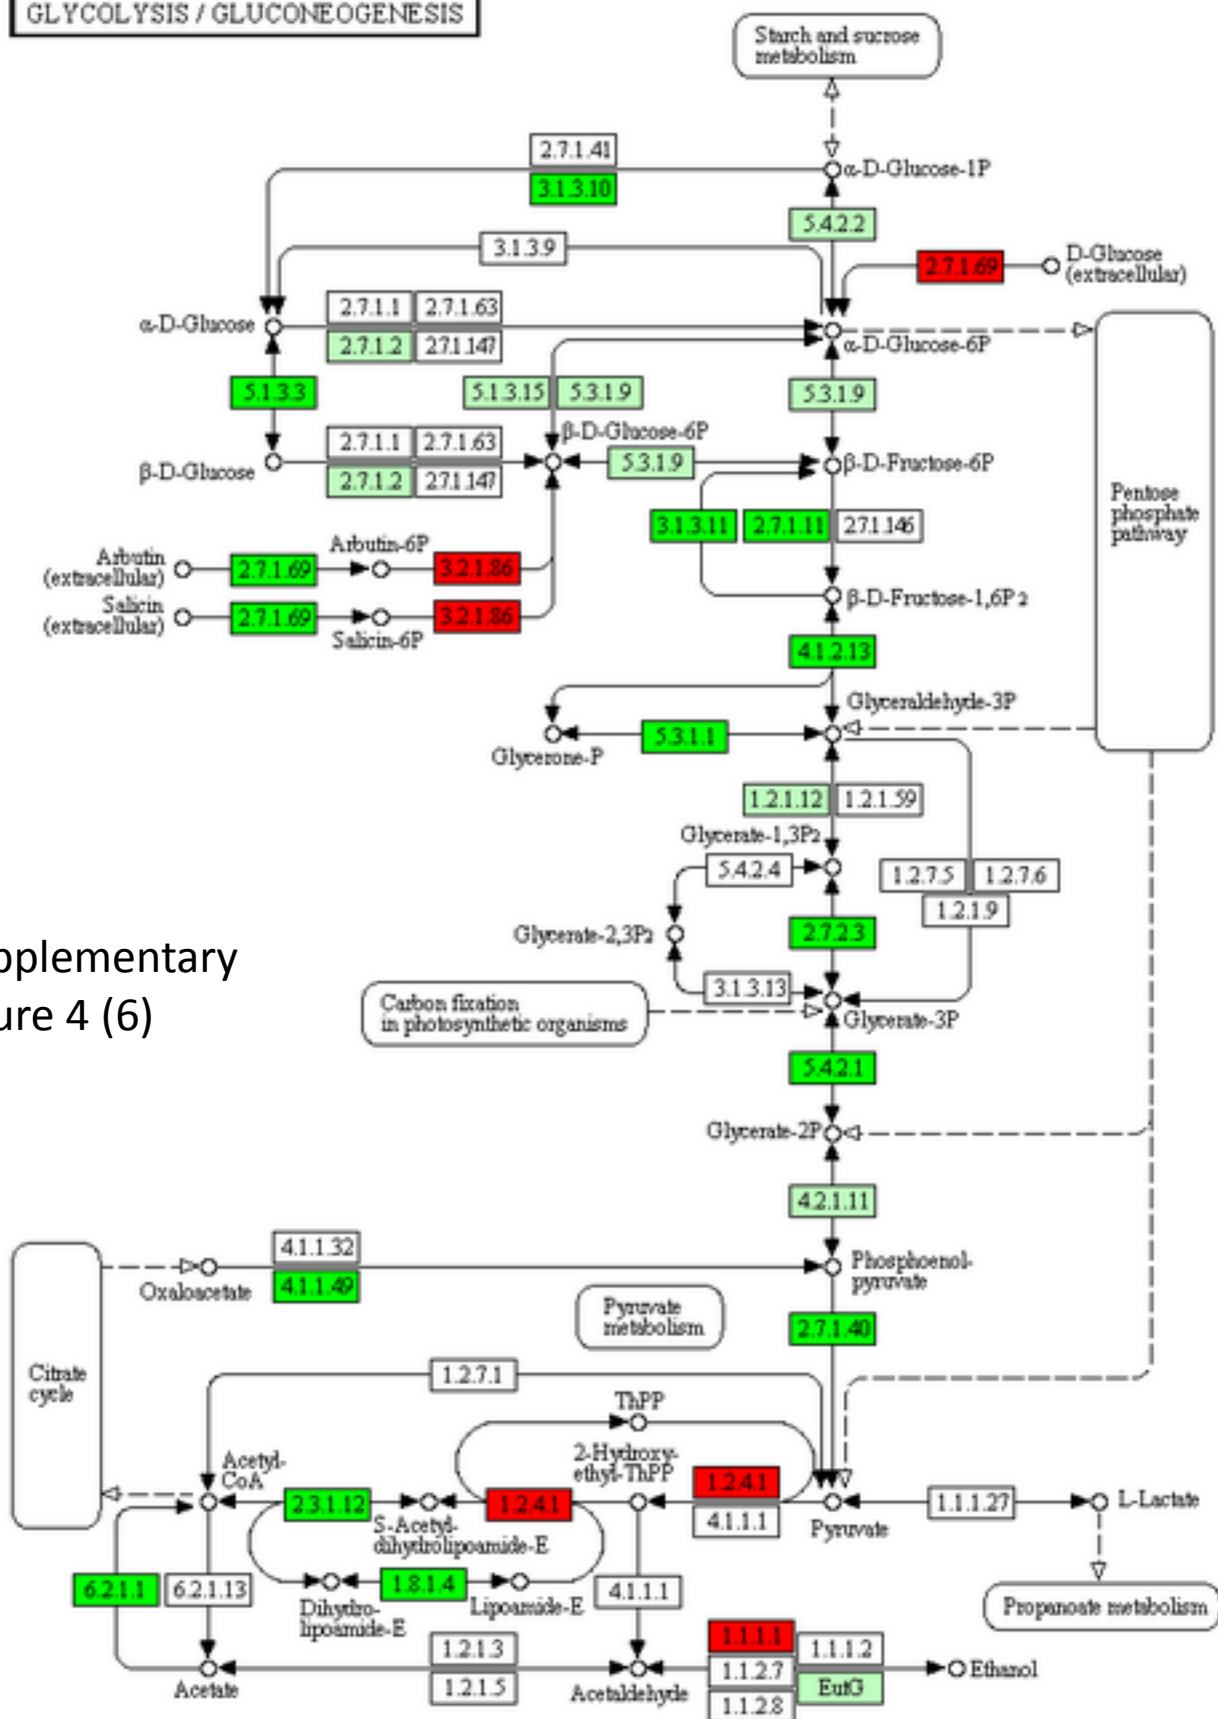

Supplementary figure 4 (6)

PHENYLALANINE, TYROSINE AND TRYPTOPHAN BIOSYNTHESIS

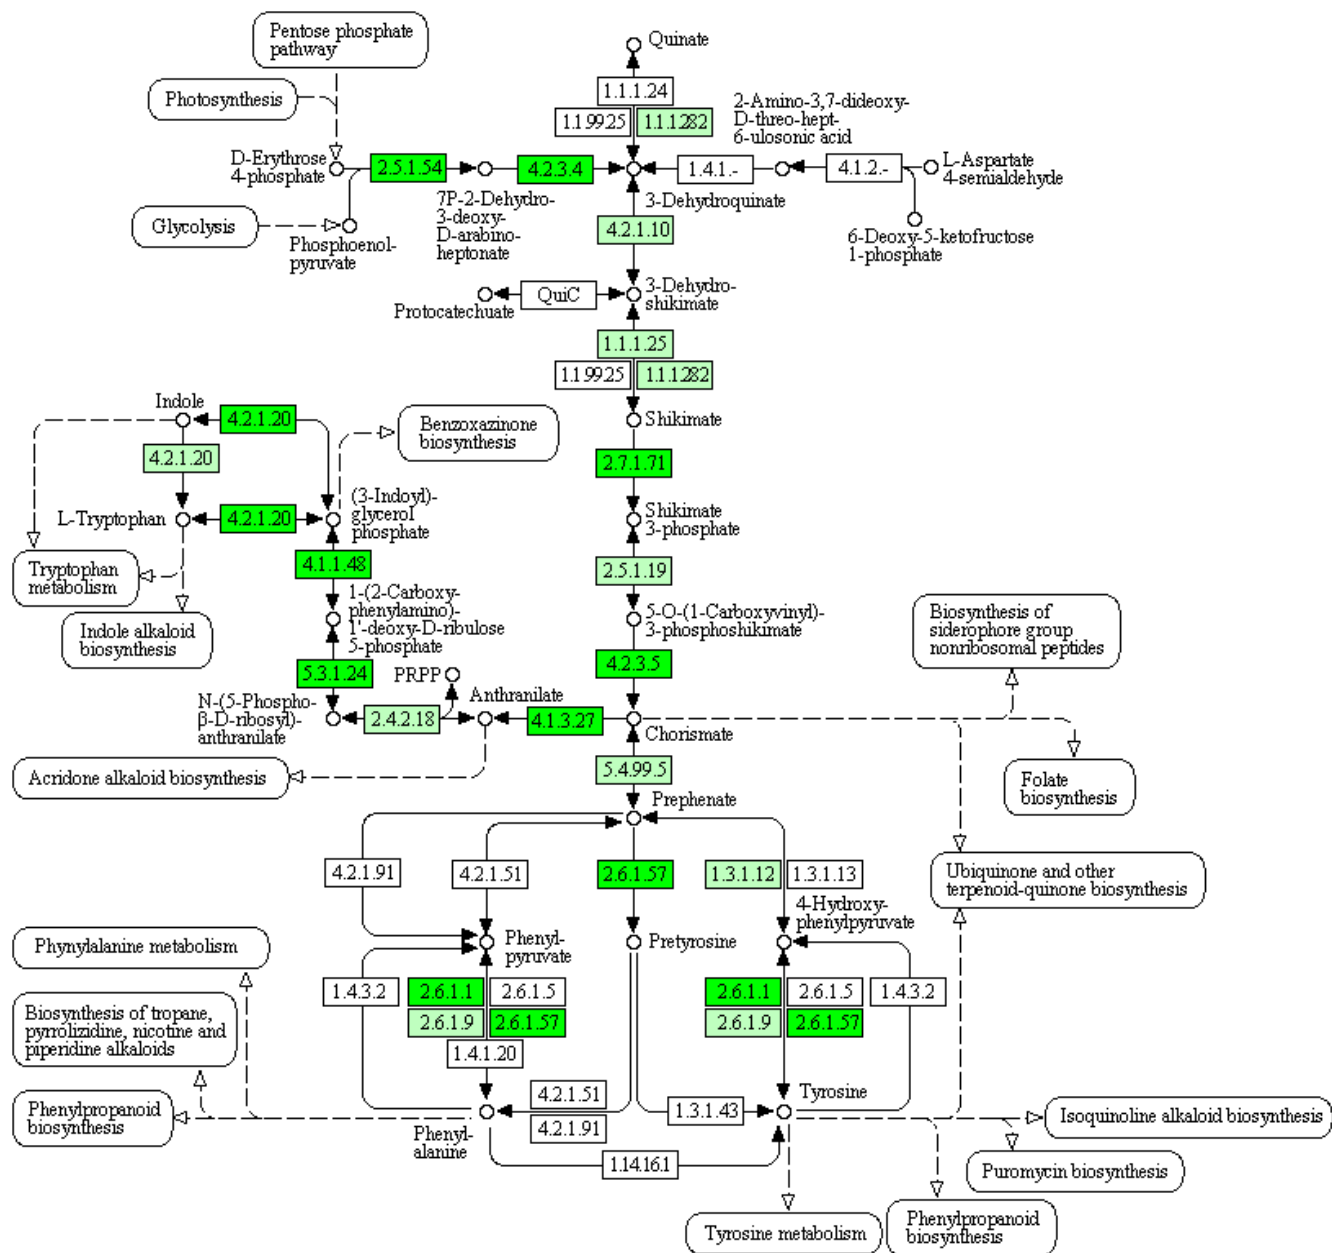

00400 6/28/10  
(c) Kanehisa Laboratories

Supplementary  
figure 4 (7)

**SAM 10% FDR - 973 negative genes**

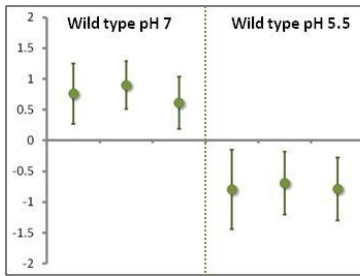

| Category        | Term                                                 | Count | PValue   | Benjamini | ASRS | AFI |
|-----------------|------------------------------------------------------|-------|----------|-----------|------|-----|
| SP_PIR_KEYWORDS | transport                                            | 115   | 6.76E-20 | 9.16E-19  |      |     |
| KEGG_PATHWAY    | eum03010:Ribosome                                    | 25    | 1.79E-16 | 1.26E-13  |      |     |
| KEGG_PATHWAY    | ecx00230:Purine metabolism                           | 28    | 6.69E-15 | 8.07E-13  |      |     |
| KEGG_PATHWAY    | ecc00240:Pyrimidine metabolism                       | 24    | 9.95E-16 | 2.12E-13  |      |     |
| KEGG_PATHWAY    | ecv00970:Aminoacyl-tRNA biosynthesis                 | 16    | 3.15E-13 | 2.14E-11  |      |     |
| KEGG_PATHWAY    | ecq00250:Alanine, aspartate and glutamate metabolism | 15    | 3.00E-11 | 1.24E-09  |      |     |
| KEGG_PATHWAY    | ecr00061:Fatty acid biosynthesis                     | 10    | 1.07E-09 | 3.25E-08  |      |     |
| SP_PIR_KEYWORDS | cell cycle                                           | 20    | 6.08E-12 | 5.44E-11  |      |     |
| KEGG_PATHWAY    | ecg00190:Oxidative phosphorylation                   | 16    | 2.63E-09 | 7.43E-08  |      |     |
| KEGG_PATHWAY    | eco00270:Cysteine and methionine metabolism          | 12    | 1.56E-07 | 2.82E-06  |      |     |
| KEGG_PATHWAY    | ecr02010:ABC transporters                            | 32    | 1.54E-08 | 3.74E-07  |      |     |
| KEGG_PATHWAY    | ecg00010:Glycolysis / Gluconeogenesis                | 16    | 4.79E-10 | 1.56E-08  |      |     |
| KEGG_PATHWAY    | ecd00620:Pyruvate metabolism                         | 23    | 1.97E-17 | 3.35E-14  |      |     |
| KEGG_PATHWAY    | ecck00500:Starch and sucrose metabolism              | 11    | 6.57E-06 | 8.58E-05  |      |     |
| KEGG_PATHWAY    | ecg02020:Two-component system                        | 26    | 2.78E-08 | 6.05E-07  |      |     |
| KEGG_PATHWAY    | eco00520:Amino sugar and nucleotide sugar metabolism | 16    | 8.13E-09 | 2.09E-07  |      |     |
| KEGG_PATHWAY    | ect00260:Glycine, serine and threonine metabolism    | 11    | 4.76E-06 | 6.35E-05  |      |     |
| KEGG_PATHWAY    | ecj02060:Phosphotransferase system (PTS)             | 14    | 4.09E-07 | 6.67E-06  |      |     |
| KEGG_PATHWAY    | ecr00770:Pantothenate and CoA biosynthesis           | 9     | 7.00E-06 | 9.07E-05  |      |     |
| KEGG_PATHWAY    | ecx03440:Homologous recombination                    | 10    | 1.06E-05 | 1.35E-04  |      |     |

crp,  
atpD,  
phoQ,  
phoP,  
lrp,  
cysB,  
evgA,  
rpoS,  
atpC

**SAM 10% FDR - 898 positive genes**

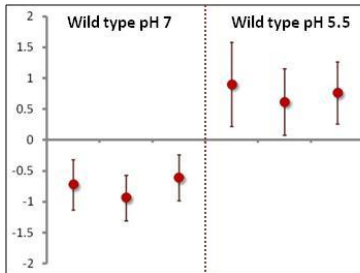

| Category        | Term                                             | Count | PValue   | Benjamini | ASRS | AFI |
|-----------------|--------------------------------------------------|-------|----------|-----------|------|-----|
| KEGG_PATHWAY    | ecd02010:ABC transporters                        | 36    | 4.19E-21 | 5.81E-18  |      |     |
| KEGG_PATHWAY    | ecj02020:Two-component system                    | 23    | 7.51E-12 | 6.51E-10  |      |     |
| KEGG_PATHWAY    | ecd00330:Arginine and proline metabolism         | 12    | 6.43E-09 | 2.88E-07  |      |     |
| GOTERM_BP_FAT   | GO:0009061~anaerobic respiration                 | 22    | 8.64E-09 | 2.66E-06  |      |     |
| KEGG_PATHWAY    | eco00540:Lipopolysaccharide biosynthesis         | 9     | 4.27E-07 | 1.44E-05  |      |     |
| SP_PIR_KEYWORDS | ion transport                                    | 22    | 8.98E-08 | 1.10E-06  |      |     |
| SP_PIR_KEYWORDS | amino-acid transport                             | 18    | 2.30E-12 | 5.63E-11  |      |     |
| KEGG_PATHWAY    | ecd00052:Galactose metabolism                    | 8     | 1.69E-05 | 5.09E-04  |      |     |
| KEGG_PATHWAY    | ecg00053:Ascorbate and aldarate metabolism       | 6     | 2.54E-05 | 7.04E-04  |      |     |
| KEGG_PATHWAY    | ecg00630:Glyoxylate and dicarboxylate metabolism | 7     | 3.49E-04 | 0.0073022 |      |     |

slp,  
gadA,  
yhiD,  
hdeA,  
hdeD

Supplementary  
figure 5

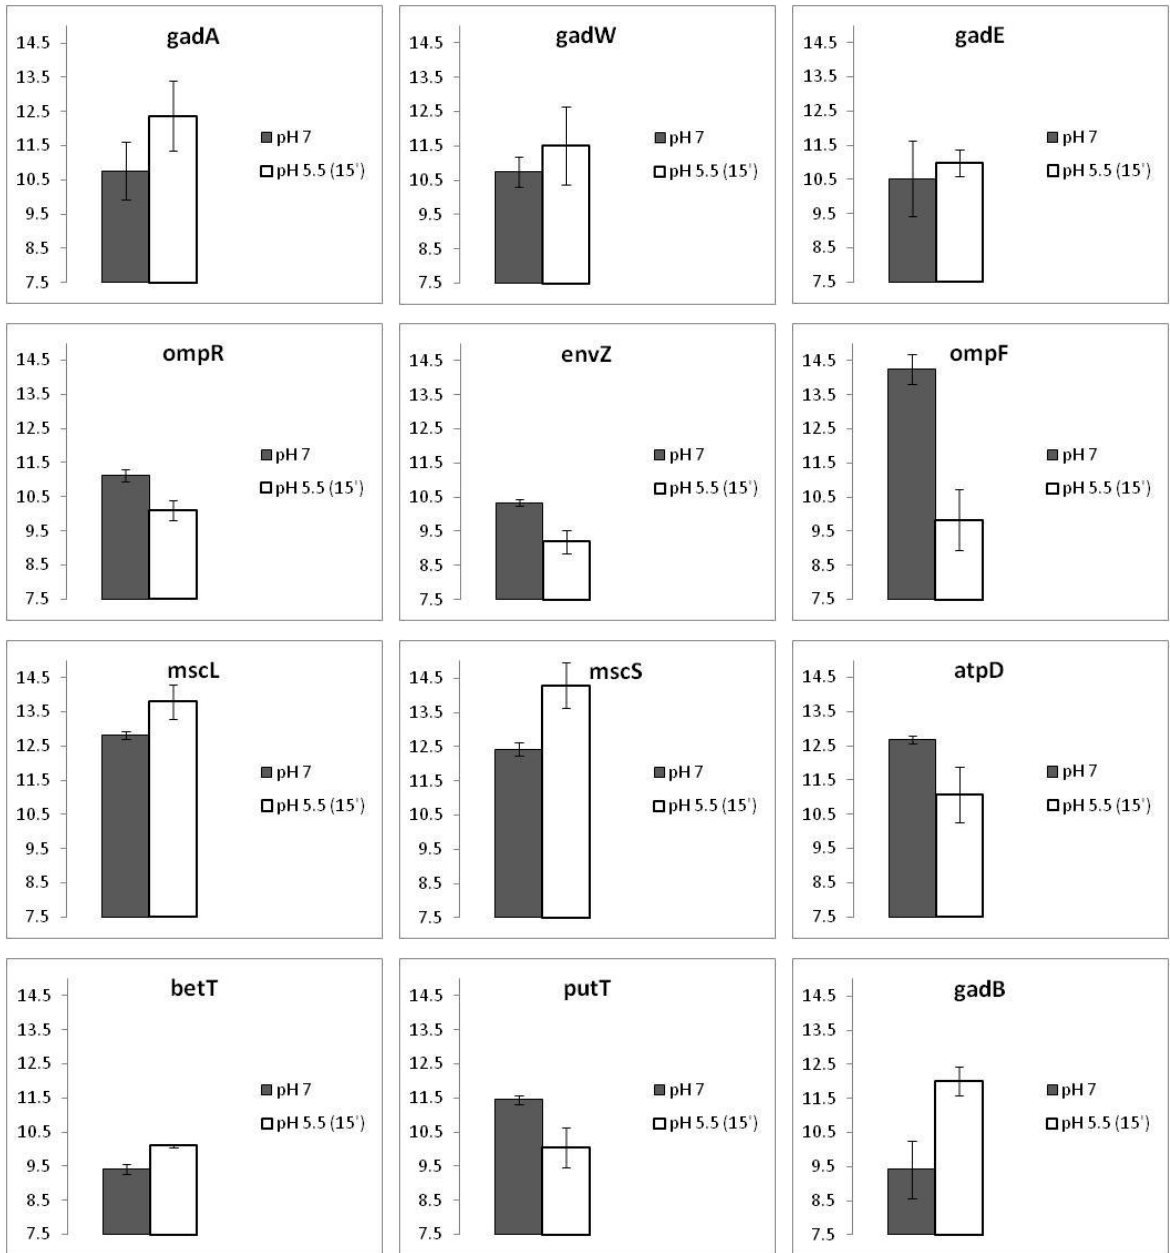

Supplementary figure 6

# C-BOX

## **cyoA: cytochrome bo terminal oxidase subunit II**

ACAGCTTCTTAAAATCAACCTGATATGTTT**TGCAACATAT**GTGACCTGGCAGCCAAATCCAAGTAACAGG

**TGAA-CAT-T**

| Start  | End    | Strand | PWM Score(s) | SEP Score | ATG-Distance | Location   |
|--------|--------|--------|--------------|-----------|--------------|------------|
| 450955 | 450964 | +      | 12.18        | -6.68     | 121          | intergenic |

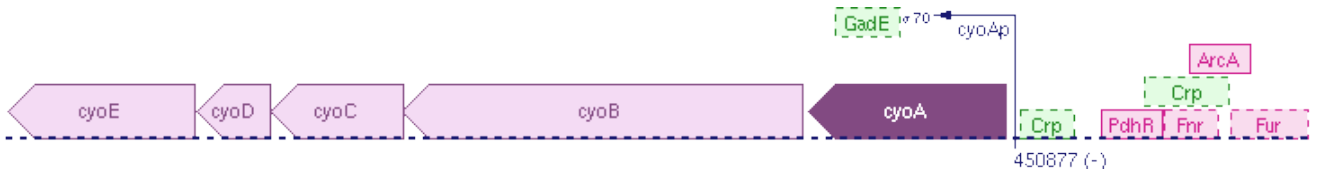

## **argQ: tRNAargQ**

AGTAATCCTCCCGGA**TGCACCATCT**CTTACTTGATACGGCTTTAGTAGCG ... (130) ...

TCGAATCCTCCCGGA**TGCACCATCT**CTTACTTGATATGGCTTTAGTAGC

**TGAA-CAT-T**

| Start   | End     | Strand | PWM Score(s) | SEP Score | ATG-Distance | Location      |
|---------|---------|--------|--------------|-----------|--------------|---------------|
| 2815943 | 2815952 | +      | 12.04        | -7.01     | 61           | intergenic    |
| 2816217 | 2816226 | +      | 12.04        | -6.84     | 335          | coding region |

## **argZ: tRNAargZ**

TTCGAATCCTCCCGGA**TGCACCATAT**TCTACGTACTTTCAGCGATGAAGG ... (124) ...

CCCGGA**TGCACCATCT**CTTACTTGATACGGCTTTAGTAGCGGTATC

**TGAA-CAT-T**

| Start   | End     | Strand | PWM Score(s) | SEP Score | ATG-Distance | Location      |
|---------|---------|--------|--------------|-----------|--------------|---------------|
| 2816217 | 2816226 | +      | 12.04        | -6.84     | 60           | coding region |
| 2816358 | 2816367 | +      | 12.04        | -6.96     | 201          | coding region |

Supplementary  
figure 7 (1)

## argY: tRNAargY

CCTCCCGGATGACCATCTCTTACTTGATACGGCTTTAGTAGCGGTATCA

TGCACCATCT  
 TGAA-CAT-T

| Start   | End     | Strand | PWM Score(s) | SEP Score | ATG-Distance | Location   |
|---------|---------|--------|--------------|-----------|--------------|------------|
| 2816358 | 2816367 | +      | 12.04        | -6.96     | 62           | intergenic |

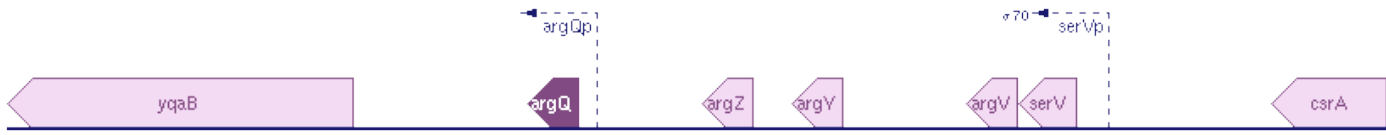

## flgH: flagellar L-ring protein

AACTGGTCAATATGATTCAAGGTGCAACGCGCTTACGAAATCAACAGTAAA ... (50) ...

CCACCGATCAGATGCTGCAAAA ACTGACGCAACTCTAAGGCTTAACCGGT

ATATGATTCA  
 TGAA-CAT-T

| Start   | End     | Strand | PWM Score(s) | SEP Score | ATG-Distance | Location      |
|---------|---------|--------|--------------|-----------|--------------|---------------|
| 1134706 | 1134715 | +      | 12.16        | -7.2      | 72           | coding region |
| 1134646 | 1134655 | +      | 12.55        | -7.55     | 132          | coding region |

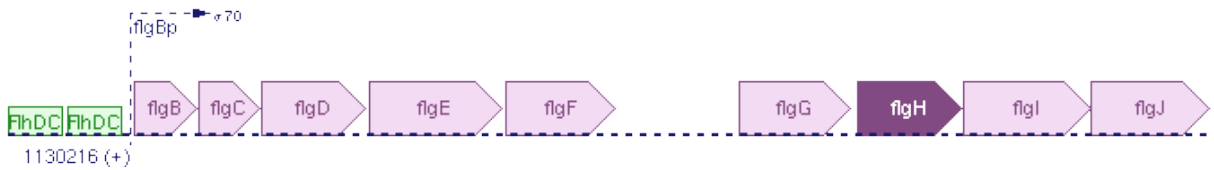



# F-BOX

## gadW: DNA-binding transcriptional dual regulator

ATATTTCGTGCTGCA**TTTACTTATT**ATCAATTAAGTGTATGCAAAACTAC

**TTTACA TTTT**

| Start   | End     | Strand | PWM Score(s) | SEP Score | ATG-Distance | Location   |
|---------|---------|--------|--------------|-----------|--------------|------------|
| 3662395 | 3662404 | +      | 13.5         | -6.45     | 147          | intergenic |

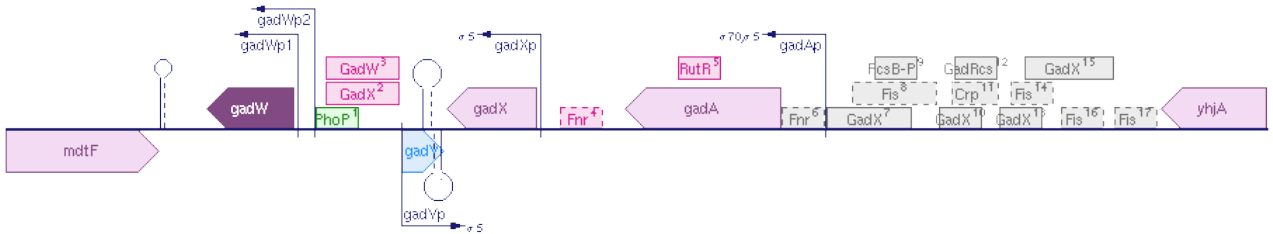

## htpX: heat shock protein, integral membrane protein

CCGTAAATCAGATGCTA**CAAAATGTAAA**GTTTGTGCTTTTCTGGTGACTTA ... (100) ...

TTTTGTAAACTGAGGT**AAAAATGAAAA**TTATG

**T TTACATTTT**

| Start   | End     | Strand | PWM Score(s) | SEP Score | ATG-Distance | Location   |
|---------|---------|--------|--------------|-----------|--------------|------------|
| 1910603 | 1910612 | -      | 13.5         | -6.42     | 3            | intergenic |
| 1910713 | 1910722 | -      | 14.09        | -7        | 113          | intergenic |

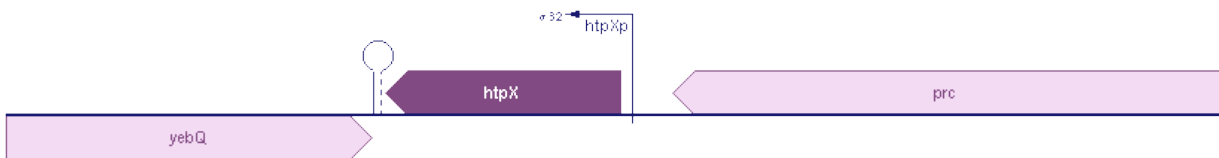

## glnK: nitrogen regulatory protein GlnK

ATTTTCATCGTTGGTGCAAAAATGTAACGCACATGTGCACTGTCATAGTGCTTTTCATTTTCAAACCTTCTT

TTTACATTTT

TTTACATTTT

| Start  | End    | Strand | PWM Score(s) | SEP Score | ATG-Distance | Location   |
|--------|--------|--------|--------------|-----------|--------------|------------|
| 471669 | 471678 | -      | 13.48        | -7.01     | 144          | intergenic |
| 471702 | 471711 | +      | 13.5         | -7.01     | 111          | intergenic |

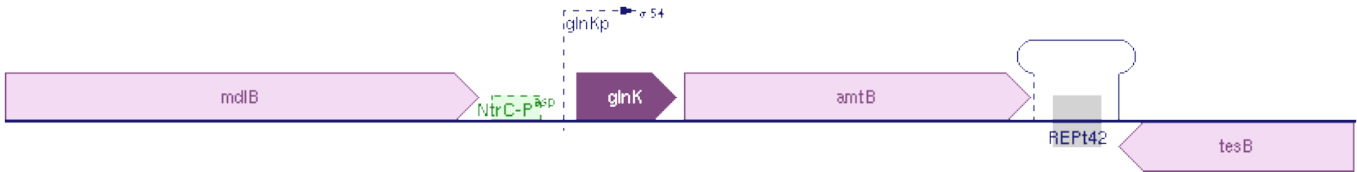

## yjFH (rlmB): 23S rRNA 2'-O-ribose G2251 methyltransferase

TCGTCAGGTCGGTAAAAAAAGGTAAACTTTGAGCCAGACAGC GCCTTCCGCG ... (310) ...

TAGTGCATCAGGCAAAACGTAAACAACGAGTACATTA ATG

TTTACATTTT

| Start   | End     | Strand | PWM Score(s) | SEP Score | ATG-Distance | Location      |
|---------|---------|--------|--------------|-----------|--------------|---------------|
| 4406507 | 4406516 | -      | 13.59        | -7.44     | 337          | coding region |
| 4406829 | 4406838 | -      | 13.59        | -7        | 15           | intergenic    |

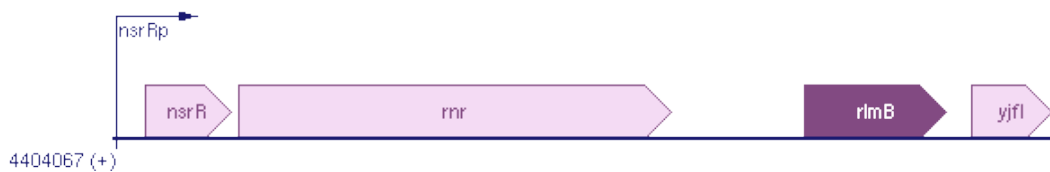

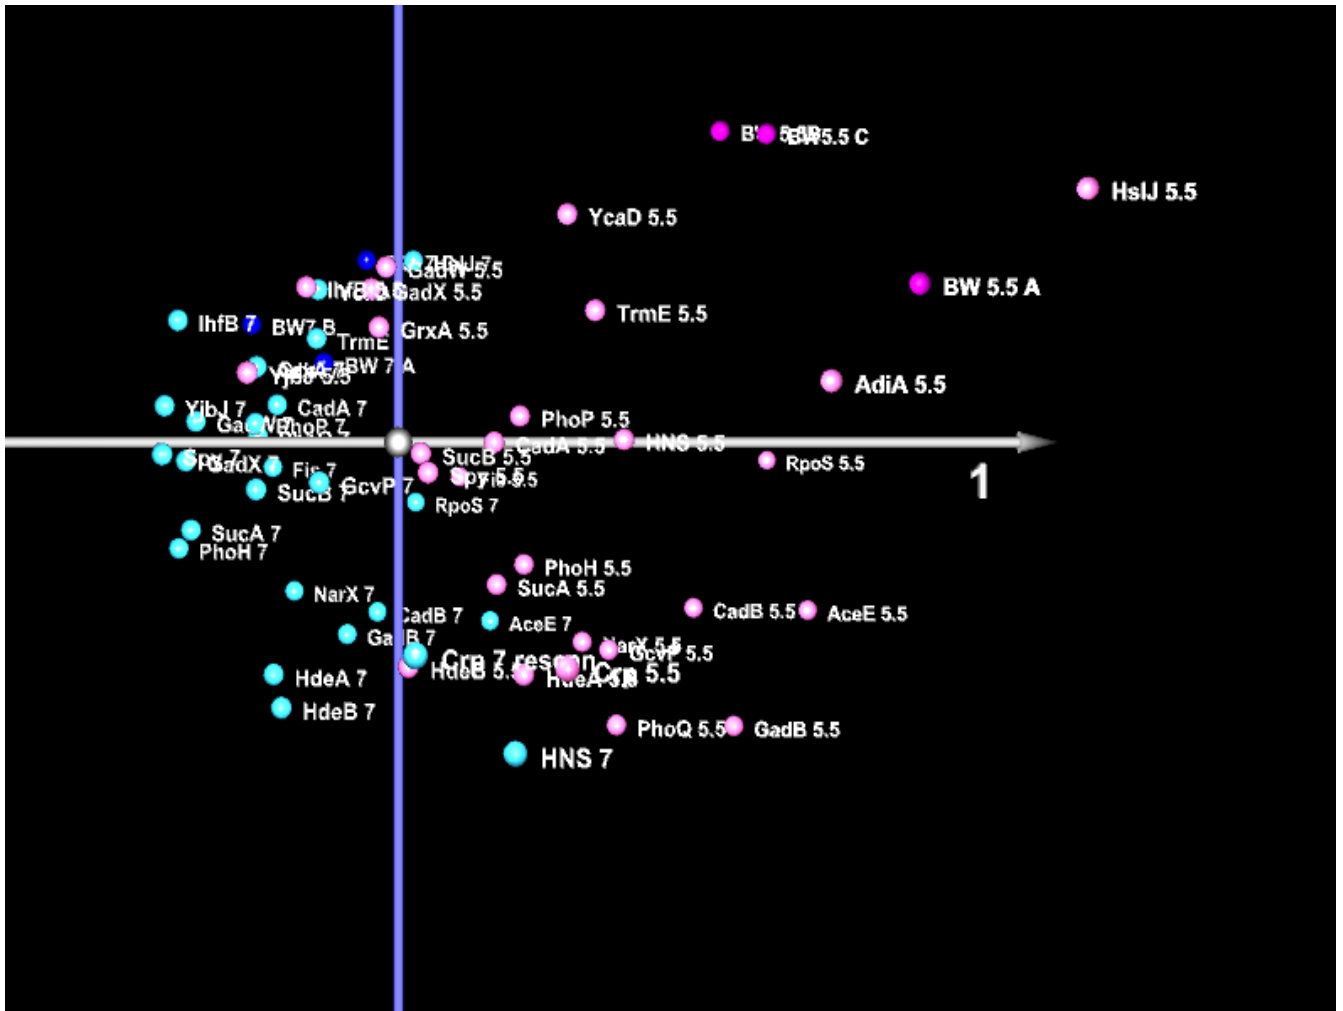

- Wild type pH 7
- Wild type pH 5.5
- Genes KO pH 7
- Genes KO pH 5.5

Supplementary  
figure 8

OXIDATIVE PHOSPHORYLATION

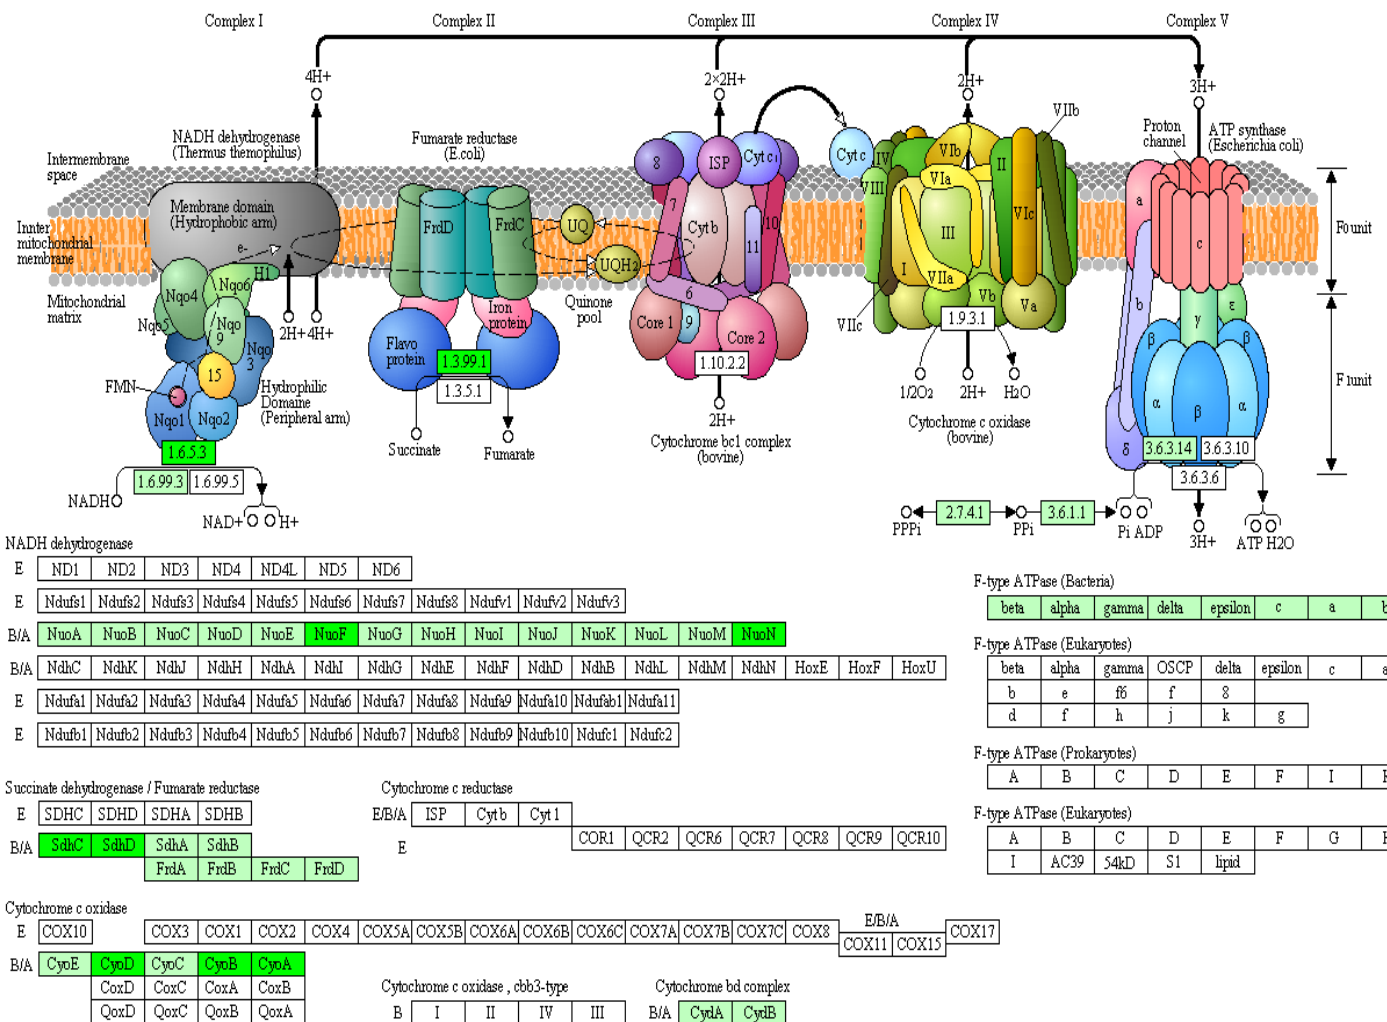

Supplementary  
figure 9 (1)

# CITRATE CYCLE (TCA CYCLE)

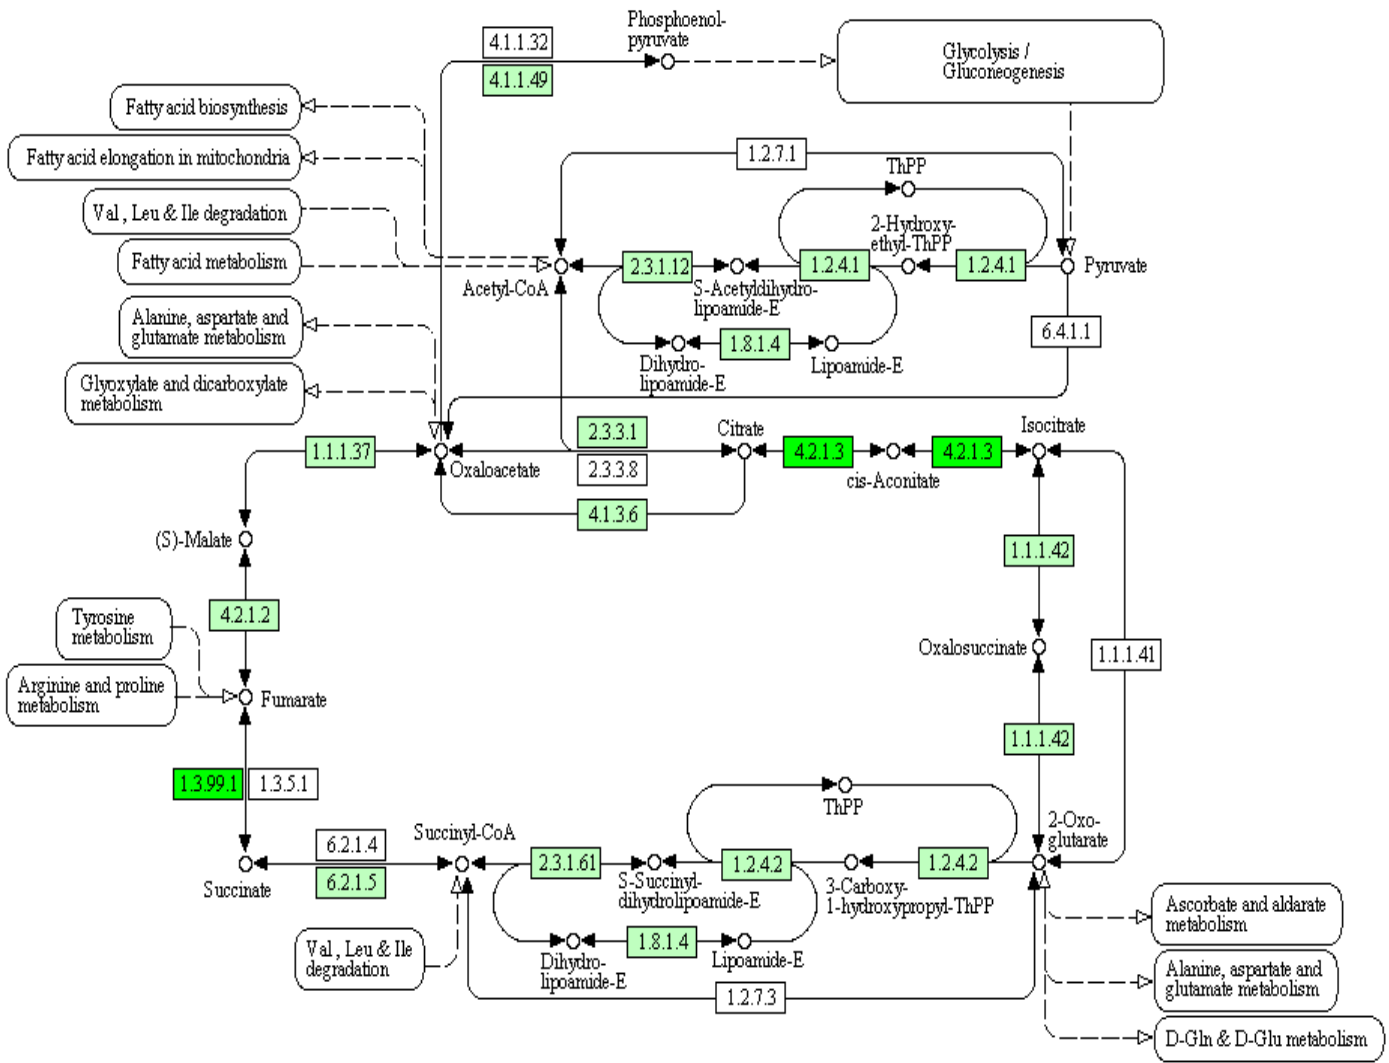

00020 6/24/10  
 (c) Kanehisa Laboratories

Supplementary  
 figure 9 (2)

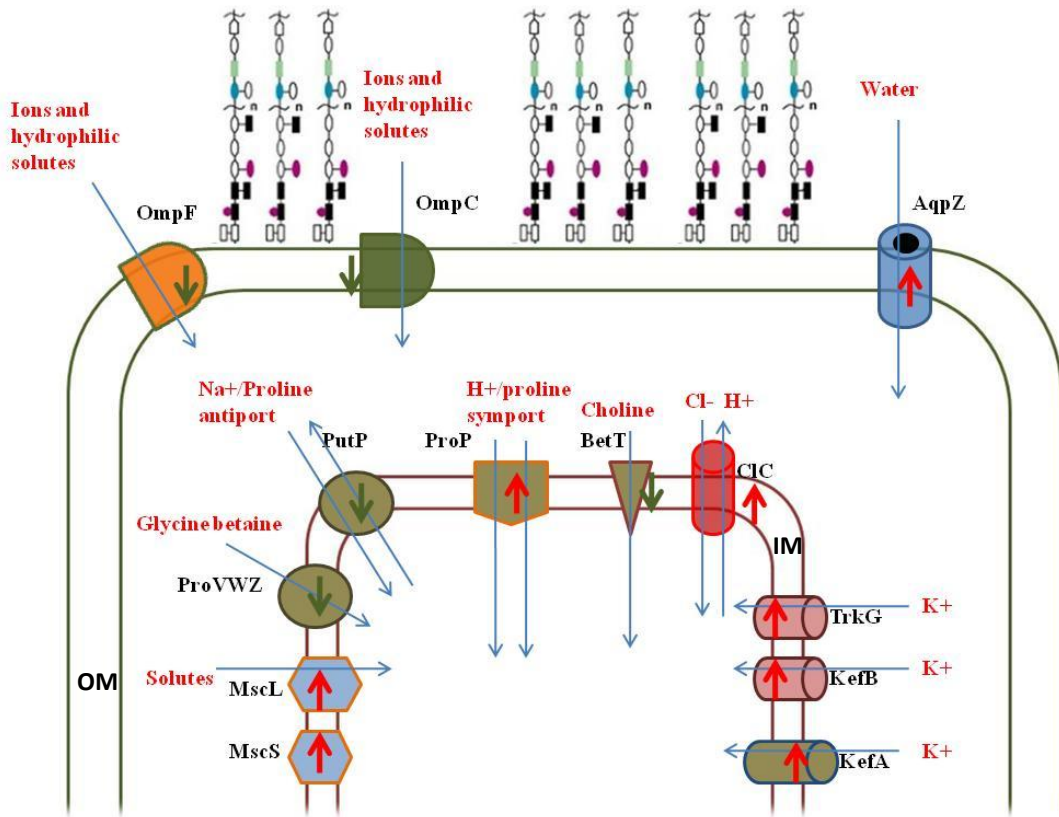

Supplementary figure 10

| Selected gene<br>DOWN-regulated | Function                                                                                               |
|---------------------------------|--------------------------------------------------------------------------------------------------------|
| crp                             | cAMP receptor protein                                                                                  |
| fliA                            | RNA polymerase sigma factor for flagellar operon                                                       |
| fnr                             | Fumarate and nitrate reduction regulatory protein                                                      |
| gadE                            | Transcriptional regulator of genes involved in acid resistance                                         |
| gcvP                            | Glycine dehydrogenase                                                                                  |
| hemE                            | Oxygen sensor protein                                                                                  |
| ihfA                            | Integration host factor subunit a                                                                      |
| ihfB                            | Integration host factor subunit b                                                                      |
| osmC                            | Osmotically-inducible protein C                                                                        |
| phoH                            | Phosphate starvation-inducible protein                                                                 |
| phoP                            | Member of the two-component regulatory system phoQ/phoP involved in adaptation to low Mg <sup>2+</sup> |
| phoQ                            | Member of the two-component regulatory system phoQ/phoP involved in adaptation to low Mg <sup>2+</sup> |
| pyrF                            | Orotidine 5'-phosphate decarboxylase                                                                   |
| rpoS                            | RNA polymerase sigma factor for protection against external stresses                                   |
| sucA                            | 2-oxoglutarate dehydrogenase E1 component                                                              |
| sucB                            | Dihydropolyllysine-residue succinyltransferase component of 2-oxoglutarate dehydrogenase complex       |
| Selected gene<br>UP-regulated   | Function                                                                                               |
| aceE                            | Pyruvate dehydrogenase E1 component                                                                    |
| adiA                            | Biodegradative arginine decarboxylase                                                                  |
| cadA                            | Lysine decarboxylase                                                                                   |
| cadB                            | Cadaverine/lysine antiporter                                                                           |
| fis                             | Factor-for-inversion stimulation protein                                                               |
| gadB                            | Glutamate decarboxylase b                                                                              |
| gadW                            | HTH-type transcriptional regulator of genes involved in acid resistance                                |
| gadX                            | HTH-type transcriptional regulator of genes involved in acid resistance                                |
| gcd                             | Quinoprotein glucose dehydrogenase                                                                     |
| grxA                            | Glutaredoxin-1                                                                                         |
| hdeA                            | Chaperone-like acid stress protein                                                                     |
| hdeB                            | Chaperone-like acid stress protein                                                                     |
| hslJ                            | Heat shock protein                                                                                     |
| narJ                            | Nitrate reductase molybdenum cofactor assembly chaperone                                               |
| narX                            | Nitrate/nitrite sensor protein                                                                         |
| rpoD                            | The primary sigma factor of E. coli                                                                    |
| spy                             | Spheroplast protein, could be involved in zinc metabolism                                              |
| trmE                            | tRNA modification GTPase                                                                               |
| ycaD                            | Uncharacterized MFS-type transporter                                                                   |
| ydeO                            | HTH-type transcriptional regulator of genes involved in acid resistance                                |
| yjbJ                            | Predicted stress response protein                                                                      |

Supplementary table 1



| NOT ADAPTED   | 5' Acid            | 30' Acid                | 1 hour Acid                  | 1 hr 30' Acid        | 2 hours Acid     | 2 hrs 30' Acid   | 3 hours Acid       |
|---------------|--------------------|-------------------------|------------------------------|----------------------|------------------|------------------|--------------------|
| $\Delta aceE$ | 0.01462<br>5.4E-09 | 2.2E-10                 | 8.69E-25<br>7.48E-25         | 1.25E-07             | 5E-21<br>2E-16   | 2E-18            | 8.4E-21<br>6.6E-12 |
| $\Delta adiA$ | 0.06828<br>0.06226 | 0.00876                 | 0.003157<br>2.93E-10         | 0.087984             | 0.0094<br>2E-16  | 0.0018           | 0.37071<br>6.6E-12 |
| $\Delta cadA$ | 0.25351            | 6.2E-05<br>1.4E-23      | 2.8E-12<br>4.83E-27          | 0.000382             | 5E-09<br>6E-08   | 1E-07            | 0.00065<br>0.01769 |
| $\Delta cadB$ | 0.5429<br>2E-09    | 2.2E-13<br>0.00045      | 2.54E-16<br>0.001868         | 0.002945<br>0.166394 | 9E-26            | 4E-29<br>9E-29   | 7.8E-15<br>1E-14   |
| $\Delta crp$  | 1.4E-07            | 0.35534<br>1.4E-09      | 0.564475<br>4.86E-13         | 0.084494<br>7.68E-09 | 0.1488<br>0.0125 | 0.4457<br>0.0589 | 0.00061            |
| $\Delta fis$  | 0.65632<br>1.8E-21 | 0.00231<br>0.01376      | 5.87E-08<br>1.89E-26         | 0.00017<br>2.53E-31  | 3E-06<br>3E-09   | 1E-07<br>1E-08   | 2.4E-06            |
| $\Delta flhA$ | 0.55652<br>0.25034 |                         | 4.72E-05<br>0.000286         | 0.015941             | 0.0001           |                  | 0.00065<br>6.3E-20 |
| $\Delta fnr$  | 0.0003<br>0.08236  | 3.8E-12                 | 2.57E-14<br>0.0016           | 6.21E-13             | 1E-08<br>0.0003  | 1E-07            | 1.8E-07<br>0.02016 |
| $\Delta gadB$ | 0.31098<br>0.00032 | 0.35472                 | 0.145061<br>1.85E-17         | 0.878042             | 0.6477<br>0.0045 | 0.0004           | 3.2E-08<br>0.56451 |
| $\Delta gadE$ | 0.32649            | 0.4173                  | 0.891394                     | 0.494995             | 0.7008<br>3E-17  | 0.7152           | 0.00051<br>8.6E-20 |
| $\Delta gadW$ | 0.01411            | 0.00876                 | 0.001978                     | 0.15801              | 0.0092           | 0.0067           | 0.36766            |
| $\Delta gadX$ | 0.06828            | 0.00359                 | 0.000515                     | 0.084125             | 0.007            | 0.0014           | 0.24428            |
| $\Delta gcd$  | 0.09307            | 4.2E-06                 | 5.6E-09                      | 3.26E-07             | 3E-06            | 0.0004           | 0.00451            |
| $\Delta gcvP$ | 0.00701<br>0.7608  | 9.2E-11<br>2E-32        | 4.69E-18<br>1.94E-31         | 1.77E-09<br>5E-34    | 4E-17            | 1E-24            | 6.8E-18            |
| $\Delta grxA$ | 0.04931<br>1       | 2.1E-07                 | 1.03E-12<br>9.35E-20         | 8.31E-09             | 1E-12<br>5E-33   | 8E-07            | 0.03779            |
| $\Delta hdeA$ | 0.15328<br>2.2E-08 | 6.8E-07<br>6.7E-06      | 3.51E-11<br>1.85E-06         | 1.12E-11<br>9.77E-05 | 1E-19<br>2E-28   | 7E-21            | 4.6E-16<br>2.1E-19 |
| $\Delta hdeB$ | 0.04416<br>2E-09   | 2.5E-05<br>2.5E-08      | 9.72E-14<br>5.71E-11         | 3.91E-10<br>2.69E-07 | 2E-11<br>3E-05   | 4E-15<br>0.0014  | 5.1E-08            |
| $\Delta hemE$ | 0.56312            | 1                       | 0.499132                     | 0.169731             | 0.1157<br>1E-07  | 0.0006<br>1E-16  | 0.2909             |
| $\Delta hns$  | 0.09307<br>1.1E-29 | 0.00046<br>2.2E-06      | 1.76E-07<br>2.96E-10         | 5.81E-07<br>5.62E-08 | 4E-10            | 1E-10            |                    |
| $\Delta hslJ$ | 1.1E-09<br>2.5E-05 | 2.4E-14                 | 4.48E-18<br>2.11E-30         | 1.28E-14             | 2E-23<br>3E-07   | 2E-24<br>2E-08   | 4E-13              |
| $\Delta ihfA$ | 0.67395            |                         | 0.001048                     | 0.000927             | 1E-05            |                  | 0.02347<br>7E-26   |
| $\Delta ihfB$ | 0.01567            | 2.5E-29                 | 1.27E-42                     | 5.02E-32             | 1E-47            | 7E-33            |                    |
| $\Delta narJ$ | 0.20821<br>0.12418 |                         | 3.02E-08<br>1.89E-07         | 2.55E-07             | 1E-12            |                  | 0.0001             |
| $\Delta narX$ | 0.00016<br>0.25351 | 5E-08                   | 6.6E-14<br>8.44E-11          | 4.37E-12             | 1E-14<br>2E-12   | 9E-15            | 1.2E-06<br>3.5E-08 |
| $\Delta osmC$ | 0.35778            | 0.00253                 | 0.000461                     | 0.000889             | 0.001<br>3E-21   | 8E-10            | 0.00615<br>3.3E-11 |
| $\Delta phoB$ | 0.28497            | 0.00033                 | 9.38E-06                     | 0.004672             | 0.0016           | 0.0011           | 0.77001            |
| $\Delta phoH$ | 0.00328<br>0.00027 | 6E-07<br>3.2E-05        | 2.58E-12<br>2.53E-05         | 2.72E-10<br>0.014569 | 8E-13            | 8E-14            | 5.4E-08            |
| $\Delta phoP$ | 0.0034<br>6.5E-13  | 4.2E-12<br>5.8E-18      | 1.02E-28<br>1.65E-22         | 3.16E-24<br>2.59E-17 | 2E-29<br>0.0019  | 5E-28<br>2E-30   | 1.6E-19            |
| $\Delta phoQ$ | 0.03514<br>0.00019 | 1E-10<br>1.9E-20        | 2.27E-17<br>3.35E-22         | 3.86E-07<br>1.21E-14 | 3E-28<br>6E-26   | 3E-32            | 8.7E-21            |
| $\Delta rpoD$ | 0.04796<br>0.26228 | 0.0024                  | 4.76E-06<br>6.2E-08          | 2.85E-05             | 1E-06<br>2E-26   | 0.0002           | 0.35803            |
| $\Delta rpoS$ | 0.00062<br>8.1E-05 | 2.4E-16                 | 9.71E-40<br>1.98E-33         | 2.32E-34             | 9E-37<br>0.0004  | 2E-38            | 2.8E-25<br>0.28719 |
| $\Delta spy$  | 5.1E-08<br>0.00021 | 5.3E-14                 | 2.17E-18<br>2.62E-18         | 7.25E-26             | 1E-26<br>1E-28   | 1E-30            | 2.6E-09<br>4.2E-20 |
| $\Delta sucA$ | 1<br>4.9E-08       | 0.01174<br>1<br>5.3E-06 | 7.5E-07<br>3.83E-29<br>1E-06 | 0.00358<br>4.59E-30  | 3E-05<br>2E-37   | 3E-07<br>1E-31   | 0.00139<br>2.9E-15 |
| $\Delta sucB$ | 1.8E-11            | 2.5E-16<br>2E-45        | 3.78E-51                     | 7.96E-45             | 0.0001           |                  | 2E-25              |
| $\Delta trmE$ | 0.0579             | 1.2E-05<br>1.2E-22      | 2.91E-08<br>1.98E-33         | 3.2E-06<br>5.44E-34  | 3E-09<br>6E-49   | 4E-10            | 8.7E-05            |
| $\Delta ycaD$ | 0.0013<br>0.14602  | 3E-09                   | 2.57E-16<br>2.78E-21         | 1.8E-14              | 5E-22<br>1E-36   | 1E-17<br>6E-35   | 2E-21              |
| $\Delta yjbJ$ | 0.00129            | 8.6E-13                 | 3.74E-19                     | 1.56E-18             | 1E-28            | 5E-25            | 5.3E-16            |

Supplementary table 2

| Adapted       | 5' Acid              | 30' Acid             | 1 hour Acid            | 1 hr 30' Acid          | 2 hours Acid       | 2 hrs 30' Acid     | 3 hours Acid         |
|---------------|----------------------|----------------------|------------------------|------------------------|--------------------|--------------------|----------------------|
| $\Delta$ aceE | 0.075344<br>0.083409 | 1.03E-11             | 0.0072696<br>8.913E-07 | 3.841E-05              | 3.9E-11<br>7E-16   |                    | 6.54E-15<br>1.1E-07  |
| $\Delta$ adiA | 0.878016<br>1        | 0.042762             | 0.6154029<br>0.0915942 | 0.6397546              | 0.2548<br>0.16437  | 0.95048            | 0.230664<br>0.020962 |
| $\Delta$ cadA | 1<br>1.36E-07        | 1.74E-06<br>4.1E-09  | 0.1649808<br>2.863E-08 | 0.1018168<br>8.186E-07 | 0.7431<br>9.4E-08  | 0.18051<br>1.3E-05 | 0.006344             |
| $\Delta$ cadB | 0.17636<br>0.574604  | 1.46E-06<br>1.4E-09  | 4.116E-07<br>7.616E-10 | 1.363E-15<br>1.861E-10 | 2.6E-14<br>1.7E-11 | 7.3E-08<br>4.9E-11 | 2.82E-13             |
| $\Delta$ crp  | 0.789608             | 0.308973<br>0.20964  | 0.0832009<br>0.0118623 | 0.0053511<br>0.0009768 | 0.03088<br>4.3E-05 | 0.00186<br>6E-06   | 0.10117              |
| $\Delta$ fis  | 0.004501<br>0.000542 | 3.51E-10<br>4.36E-12 | 2.595E-14<br>2.313E-11 | 1.111E-13<br>2.45E-09  | 4.6E-05<br>2.6E-11 | 2.2E-15<br>7E-08   | 1.35E-22<br>6.36E-12 |
| $\Delta$ fliA | 0.546682<br>0.714445 |                      | 0.0965822<br>0.8906121 | 0.0176328              | 0.00012<br>0.46369 |                    | 1.59E-07<br>1.16E-06 |
| $\Delta$ fnr  | 0.318917<br>0.682717 | 0.000818             | 0.0432246<br>0.0331891 | 0.0023893              | 0.06904<br>0.0007  | 0.02061            | 0.013721<br>0.000123 |
| $\Delta$ gadB | 0.012873<br>0.362411 | 0.002142             | 0.0025326<br>0.0001424 | 0.0006941              | 0.12124<br>0.00052 | 0.01533            | 8.17E-05<br>0.003703 |
| $\Delta$ gadE | 1                    | 0.077068             | 0.0573446              | 0.2011729              | 0.00946            | 0.0205             | 3.16E-14             |
| $\Delta$ gadW | 0.23513              | 0.205339             | 0.8103924              | 0.1889988              | 0.06232            | 0.16803            | 0.017468             |
| $\Delta$ gadX | 0.574604             | 0.029604             | 0.7726554              | 0.8361599              | 0.24237            | 0.04366            | 0.534169             |
| $\Delta$ gcd  | 1                    | 3.28E-07             | 2.345E-10              | 3.43E-09               | 1.7E-13            | 0.00517            | 2.64E-06             |
| $\Delta$ gcvP | 0.670637             | 3.87E-14<br>2.4E-21  | 9.035E-17<br>7.685E-18 | 2.127E-08<br>4.834E-17 | 2.2E-14<br>6.2E-24 | 8.4E-16            | 2E-18                |
| $\Delta$ grxA | 0.057137<br>0.174001 | 1.07E-07             | 1.779E-12<br>4.047E-22 | 5.483E-13              | 5.1E-17<br>5.1E-35 | 0.0009             | 2.86E-12<br>5.05E-31 |
| $\Delta$ hdeA | 0.544708<br>5.48E-08 | 0.000328<br>4.98E-05 | 0.0159322<br>0.0036791 | 3.699E-05<br>0.0037073 | 4.4E-06<br>0.00053 | 0.00385<br>0.29809 | 7.73E-10             |
| $\Delta$ hdeB | 6.59E-06<br>0.107933 | 2.8E-06<br>3.28E-15  | 1.876E-09<br>8.386E-21 | 3.827E-09<br>2.338E-23 | 7.9E-16<br>2.2E-26 | 5.1E-10<br>2E-20   | 4.89E-11             |
| $\Delta$ hemE | 1                    | 1.9E-09              | 0.0003275              | 7.779E-09              | 1.4E-14            | 8.8E-08            |                      |
| $\Delta$ hns  | 1<br>2.37E-05        | 0.934674<br>0.000203 | 0.7014699<br>1.251E-10 | 0.5832177<br>1.855E-12 | 0.06495<br>3.9E-10 | 0.39455<br>0.00478 | 0.609855             |
| $\Delta$ hslJ | 9.53E-05<br>0.001909 | 2.02E-22             | 2.709E-23<br>2.576E-35 | 1.879E-24              | 6.8E-24<br>7.7E-41 | 2E-18              | 1.25E-24<br>1.48E-34 |
| $\Delta$ ihfA | 0.341107             |                      | 0.5706497              | 0.0100294              | 0.02024            |                    | 5.21E-06             |
| $\Delta$ ihfB | 0.003852             | 3.11E-31             | 2.489E-38              | 7.414E-39              | 3.5E-43            | 6.6E-33            |                      |
| $\Delta$ narJ | 0.028442<br>0.760854 |                      | 2.514E-10<br>0.00127   | 1.331E-10              | 6.4E-11<br>0.00012 |                    | 1.11E-19<br>2.74E-21 |
| $\Delta$ narX | 0.001453<br>0.648651 | 2.01E-16             | 6.157E-17<br>9.894E-25 | 7.956E-12              | 2.2E-24<br>1.6E-31 | 1.5E-17            | 4.91E-16<br>7.19E-29 |
| $\Delta$ osmC | 0.661035             | 2.75E-07             | 0.0002735              | 2.585E-05              | 2.3E-06            | 0.00609            | 0.019574             |
| $\Delta$ phoB | 0.458968             | 0.060055             | 0.47284                | 0.0818702              | 0.04829            | 0.74503            | 0.006774             |
| $\Delta$ phoH | 0.042711<br>1.3E-07  | 5.15E-05<br>4.19E-07 | 0.0004196<br>1.359E-06 | 0.0001068<br>7.666E-05 | 5E-07<br>2E-07     | 0.0003             | 8.83E-08             |
| $\Delta$ phoP | 0.247232<br>0.016086 | 3.51E-05<br>1.16E-07 | 1.611E-06<br>8.401E-11 | 1.45E-07<br>7.264E-11  | 1.2E-10<br>1.4E-18 | 0.00012            | 5.85E-07             |
| $\Delta$ phoQ | 0.107349<br>0.029016 | 8.02E-05<br>0.000224 | 1.313E-07<br>0.0006113 | 7.916E-18<br>0.0001233 | 1.6E-21<br>0.00012 | 2.1E-15            | 5.25E-22             |
| $\Delta$ rpoD | 0.132226<br>0.737511 | 0.001913             | 0.009447<br>0.0963165  | 0.0015525              | 5.7E-05<br>0.00063 | 0.0196             | 3.23E-05<br>0.000346 |
| $\Delta$ rpoS | 0.191247<br>0.045437 | 0.005896             | 2.734E-08<br>5.821E-07 | 1.593E-13              | 2.1E-14<br>9.7E-07 | 1.7E-07            | 8.62E-19<br>7.88E-07 |
| $\Delta$ spy  | 0.450564<br>0.346179 | 6.61E-09             | 1.762E-07<br>4.915E-08 | 5.684E-12              | 1.4E-13<br>2.2E-17 | 7.9E-09            | 1.31E-11<br>4.17E-19 |
| $\Delta$ sucA | 0.682717<br>0.05026  | 0.000509<br>1.18E-07 | 0.0079459<br>2.774E-05 | 3.479E-05<br>3.005E-05 | 5.9E-09<br>3.8E-07 | 0.00179            | 1.29E-06             |
| $\Delta$ sucB | 0.182463<br>1.47E-10 | 3.52E-05<br>6.12E-48 | 3.569E-06<br>1.833E-43 | 1.45E-07<br>1.016E-43  | 0.00052<br>7.5E-45 | 1.5E-06            | 6.02E-09             |
| $\Delta$ trmE | 0.260049<br>0.000138 | 0.005123<br>7.77E-18 | 0.0501222<br>1.809E-20 | 0.0300787<br>1.52E-25  | 0.00518<br>2.1E-28 | 0.12411<br>1.1E-22 | 0.002365<br>1.82E-21 |
| $\Delta$ ycaD | 0.079489<br>0.004901 | 1.09E-15             | 7.44E-29<br>3.524E-37  | 2.407E-31              | 9.9E-35<br>3.8E-38 | 1.3E-27            | 1.58E-30<br>2.06E-36 |
| $\Delta$ yjbJ | 0.217782             | 1.7E-22              | 5.91E-30               | 4.08E-28               | 1.8E-36            | 6.2E-26            |                      |

Supplementary table 3

|                                                     |                                                                           |
|-----------------------------------------------------|---------------------------------------------------------------------------|
| <b>GO_BP Nitrogen compound biosynthetic process</b> |                                                                           |
| aroM                                                | Protein aroM                                                              |
| asnC                                                | Asparaginyl-tRNA synthetase; Regulatory protein asnC                      |
| bioF                                                | 8-amino-7-oxononanoate synthase                                           |
| cysJ                                                | Sulfite reductase [NADPH] flavoprotein alpha-component                    |
| fliY                                                | Cystine-binding periplasmic protein                                       |
| folE                                                | GTP cyclohydrolase 1                                                      |
| gltI                                                | Glutamate/aspartate periplasmic-binding protein                           |
| ihvM                                                | Acetolactate synthase isozyme 2 small subunit                             |
| metA                                                | Homoserine O-succinyltransferase                                          |
| nadC                                                | Nicotinate-nucleotide pyrophosphorylase [carboxylating]                   |
| ndk                                                 | Nucleoside diphosphate kinase                                             |
| panD                                                | Aspartate 1-decarboxylase                                                 |
| pheL                                                | Phe operon leader peptide                                                 |
| pheP                                                | Phenylalanine-specific permease                                           |
| potA                                                | Spermidine/putrescine import ATP-binding protein potA                     |
| serS                                                | Seryl-tRNA synthetase                                                     |
| thiD                                                | Phosphomethylpyrimidine kinase                                            |
| yqeA                                                | Carbamate kinase-like protein yqeA                                        |
| <b>SP_PIR Lipopolysaccharide biosynthesis</b>       |                                                                           |
| eptB                                                | Phosphoethanolamine transferase                                           |
| lpcA                                                | Phosphoheptose isomerase                                                  |
| rfaF                                                | ADP-heptose--LPS heptosyltransferase 2                                    |
| rfaJ                                                | Lipopolysaccharide 1,2-glucosyltransferase                                |
| rfe                                                 | Undecaprenyl-phosphate alpha-N-acetylglucosaminyl 1-phosphate transferase |
| <b>SP_PIR Sugar transport</b>                       |                                                                           |
| agaD                                                | N-acetylgalactosamine permease IID component                              |
| agaV                                                | N-acetylgalactosamine-specific phosphotransferase enzyme IIB component 2  |
| malF                                                | Maltose transport system permease protein malF                            |
| sgcC                                                | Putative permease IIC component                                           |
| ulaA                                                | Ascorbate-specific permease IIC component ulaA                            |
| xylE                                                | D-xylose-proton symporter                                                 |
| ycjP                                                | Inner membrane ABC transporter permease protein ycjP                      |
| <b>GO_BP Anaerobic respiration</b>                  |                                                                           |
| acnA                                                | Aconitate hydratase 1                                                     |
| acnB                                                | Aconitate hydratase 2                                                     |
| hyfC                                                | Hydrogenase-4 component C                                                 |
| hyfE                                                | Hydrogenase-4 component E                                                 |
| menA                                                | 1,4-dihydroxy-2-naphthoate octaprenyltransferase                          |
| nrfF                                                | Formate-dependent nitrite reductase complex subunit nrfF                  |
| nuoF                                                | NADH-quinone oxidoreductase subunit F                                     |
| nuoN                                                | NADH-quinone oxidoreductase subunit N                                     |
| <b>KEGG ABC Transporters</b>                        |                                                                           |
| cydC                                                | ATP-binding/permease protein cydC                                         |
| fhuD                                                | Iron(3+)-hydroxamate-binding protein fhuD                                 |
| fliY                                                | Cystine-binding periplasmic protein                                       |
| gltI                                                | Glutamate/aspartate periplasmic-binding protein                           |
| malF                                                | Maltose transport system permease protein malF                            |
| potA                                                | Spermidine/putrescine import ATP-binding protein potA                     |
| <b>GO_BP Aerobic respiration</b>                    |                                                                           |
| acnA                                                | Aconitate hydratase 1                                                     |
| acnB                                                | Aconitate hydratase 2                                                     |
| cyoA                                                | Ubiquinol oxidase subunit 2                                               |
| cyoB                                                | Ubiquinol oxidase subunit 1                                               |
| cyoD                                                | Cytochrome o ubiquinol oxidase protein cyoD                               |
| nuoF                                                | NADH-quinone oxidoreductase subunit F                                     |
| nuoN                                                | NADH-quinone oxidoreductase subunit N                                     |
| ppc                                                 | Phosphoenolpyruvate carboxylase                                           |
| sdhC                                                | Succinate dehydrogenase cytochrome b556 subunit                           |
| sdhD                                                | Succinate dehydrogenase hydrophobic membrane anchor subunit               |
| ubiA                                                | 4-hydroxybenzoate octaprenyltransferase                                   |
| <b>KEGG Oxidative phosphorylation</b>               |                                                                           |
| cyoA                                                | Ubiquinol oxidase subunit 2                                               |
| cyoB                                                | Ubiquinol oxidase subunit 1                                               |
| cyoD                                                | Cytochrome o ubiquinol oxidase protein cyoD                               |
| nuoF                                                | NADH-quinone oxidoreductase subunit F                                     |
| nuoN                                                | NADH-quinone oxidoreductase subunit N                                     |
| sdhC                                                | Succinate dehydrogenase cytochrome b556 subunit                           |
| sdhD                                                | Succinate dehydrogenase hydrophobic membrane anchor subunit               |
| <b>KEGG TCA Cycle</b>                               |                                                                           |
| acnA                                                | Aconitate hydratase 1                                                     |
| acnB                                                | Aconitate hydratase 2                                                     |
| sdhC                                                | Succinate dehydrogenase cytochrome b556 subunit                           |
| sdhD                                                | Succinate dehydrogenase hydrophobic membrane anchor subunit               |

|                        | SAM 10% FDR (WILD TYPE pH 7 vs WILD TYPE pH 5.5) | SAM 10% FDR (WILD TYPE pH 7 vs OMPR pH 7) | SAM 10% FDR (WILD TYPE pH 5.5 vs OMPR pH 5.5) |
|------------------------|--------------------------------------------------|-------------------------------------------|-----------------------------------------------|
| <b>UP_Regulation</b>   | GO_BP Transport                                  | KEGG Fatty acid metabolism                | GO_BP Response to stress                      |
|                        |                                                  | KEGG Flagellar assembly                   | GO_BP Cell cycle                              |
|                        |                                                  | KEGG ABC transporters                     | KEGG Pyruvate metabolism                      |
| <b>DOWN-Regulation</b> | GO_BP Translation                                | GO_BP Translation                         | GO_BP Transport                               |
|                        | KEGG Pyruvate metabolism                         | KEGG Rybosome                             |                                               |
|                        | KEGG Ribosome                                    | KEGG Pyrimidine metabolism                |                                               |

Supplementary table 5

**Down-regulated (91 genes)**

| <b>Category</b> | <b>Term</b>                                      | <b>Count</b> | <b>PValue</b> | <b>Benjamini</b> |
|-----------------|--------------------------------------------------|--------------|---------------|------------------|
| KEGG_PATHWAY    | eum00190:Oxidative phosphorylation               | 24           | 1.84E-39      | 1.05E-36         |
| KEGG_PATHWAY    | eco00020:Citrate cycle (TCA cycle)               | 16           | 6.31E-25      | 6.04E-23         |
| KEGG_PATHWAY    | ece00630:Glyoxylate and dicarboxylate metabolism | 5            | 1.46E-04      | 0.001474         |
| KEGG_PATHWAY    | ece00640:Propanoate metabolism                   | 5            | 4.76E-05      | 5.94E-04         |
| KEGG_PATHWAY    | ecd00620:Pyruvate metabolism                     | 5            | 3.45E-04      | 0.00309          |

**Up-regulated (83 genes)**

| <b>Category</b> | <b>Term</b>                      | <b>Count</b> | <b>PValue</b> | <b>Benjamini</b> |
|-----------------|----------------------------------|--------------|---------------|------------------|
| GOTERM_BP_FAT   | GO:0009061~anaerobic respiration | 25           | 1.01E-29      | 1.93E-27         |
| KEGG_PATHWAY    | ecv03010:Ribosome                | 8            | 1.82E-09      | 6.12E-08         |
| KEGG_PATHWAY    | ecd00910:Nitrogen metabolism     | 6            | 1.22E-06      | 1.97E-05         |
| SP_PIR_KEYWORDS | chemotaxis                       | 3            | 0.00136       | 0.004732         |

Supplementary table 6

## **Supplementary figures and tables**

### **Supplementary figure 1: Phenotype controls for the flow cytometry analysis**

Flow cytometry analysis of living cells at pH 7 (quadrant left bottom) and dead cells, previously treated with EtOH (quadrant left up). Propidium Iodide and BOX were used as fluorescence dyes on the Y and X axis respectively. These distributions were used in subsequent experiments to infer proportions of living and dead cells at various times after acidification.

### **Supplementary figure 2: Variability between samples at pH 7 in continuous culture experiments**

The above graph shows plots of control pH 7 culture collected after reaching steady state as described in materials and methods at a) 0min, b) 15min, c) 30min and d) 1hour of growth at pH7 in a microarray experiment. On the X-axis the mean log signal intensity across the four time points is plotted against the log signal intensity of each replicate subtracted from the mean divided by the mean log signal intensity. The graphs clearly show that the variation between replicates is about 5%. The median of coefficient of variation between the control replicates is 10%.

### **Supplementary figure 3: Identification of the genes modulated during acid adaptation at operon level**

We have considered the most modulated functions: S2 (A) Oxidative phosphorylation, with some of the representative enzymes; S2(B) Anaerobic respiration; S2 (C) Glycolysis/Gluconeogenesis; S2(D) ABC transporters. In the figure are shown some of the components belonging to the modulated functions and their regulation at the operon level. The red arrows are indicative of up-regulation, viceversa for the green arrows.

### **Supplementary figure 4-(1-7): Identification of the pathways modulated in response to acid adaptation**

The figures represent the genes for each considered pathway, which are modulated in response to acid. In red the genes up-regulated and in green the genes down-regulated.

### **Supplementary figure 5: SAM analysis of the three replicates at pH 7 and pH 5.5 of the wild type strain, 15 minute time point**

The SAM analysis (10% FDR) found 973 genes down-regulated and 898 genes up-regulated. After a functional annotation analysis, we have found that most of the functions down-regulated are involved in the energy metabolism and the up-regulated are characterised by genes coding for membrane transporters.

### **Supplementary figure 6: Gene expression profiles of selected genes in the three replicates**

Expression levels of each gene are shown at pH 7 and at pH 5.5. The error bars represent standard deviations of the three replicates.

### **Supplementary figure 7 (1-4): Binding site analysis of potential OmpR target**

The potential binding sites of the OmpR are shown in figure 1-3, which were detected in the base of the similarity with *ompC*-box. For each gene considered, the genome sequence, the statistical relevance of the similarity and the relative operon are shown. Figures 7 (4-5) are related to the same analysis, but considering *ompF*-box. PWM scores and SEP scores were determinant for the selection of the targets.

### **Supplementary figure 8: Principal component analysis of the gene KO**

The three replicates of the wild type are indicated in blue for the pH 7 and in red for the pH 5.5. The mutants at pH 7 are represented by the light blue dots, at pH 5.5 by the pink dots. The first component, which defines the shift following acid exposure, is on the X axis.

### **Supplementary figure 9-(1-7): Identification of the pathways modulated in response to acid adaptation for the genes predictive of the phenotypic outcome**

The figures represent the genes for each considered pathway, which are modulated in response to acid. In red the genes up-regulated and in green the genes down-regulated.

### **Supplementary figure 10: Schematic representation of the genes involved in the regulation of the osmotic response**

The proteins expressed on the inner membrane (IM) and periplasmic membrane (PM) are represented in the figure. The green arrows indicate the effect of down-regulation, the red arrows instead are for the up-regulation after acid adaptation.

### **Supplementary table 1: Selection of the genes from the wild type time course**

### **Supplementary tables 2-3: Mutant strains showing a significant acid response phenotype**

The tables show, for each mutant, the p-values obtained from the Fisher exact test. p-values were computed on the percentages of healthy cells as defined by the flow cytometry. Where two p-values are present, two biological replicates were considered. Supplementary table 2 shows the values of the not adapted mutants; in supplementary table 3 are shown the values of the adapted samples.

### **Supplementary table 4: Functions enriched by the genes differentially expressed between the three phenotypic groups**

The analysis performed between the three groups considering log2 ratios of gene expression values gave us a list of 221 genes. We have performed a functional annotation analysis, which results are shown in this figure. We have selected the functions more represented and the representing genes.

### **Supplementary table 5: SAM comparison performed considering $\Delta ompR$ at pH 7, 5.5 and the wild type**

The functions enriched by the genes differentially expressed between the wild type at pH 7 and the mutant at pH 7 (column 1), wild type pH 5.5 and mutant at pH 5.5 (column 2) and wild type at pH 7 and pH 5.5 (column 3) are represented. In the tables the functions are also represented that for each analysis were found up and down-regulated.

### **Supplementary table 6: FNR target genes modulation in response to acid exposure**

FNR target genes were selected on the acid adaptation time course. A functional analysis was performed with DAVID, finding pathways that are up and down-regulated in response to pH 5.5, which
